# Supplementary material for: Insights into the daily functions of radix Panax notoginseng
Source: Royal Society of Chemistry journal article supplement (doi:10.1039/d6ra01935h), 2026-04-27
Supplement: d6ra01935h1.pdf [file d6ra01935h1.pdf]

## Supplementary information

### Insights into the daily functions of Radix *Panax notoginseng*

Lei Xiao<sup>a,#</sup>, Zi-Jian Qiu<sup>b,#</sup>, Jing Wu<sup>b</sup>, Li-Li Ye<sup>b</sup>, Lin Li<sup>a</sup>, Bing Li<sup>a</sup>, Mei-Fen Bao<sup>b,\*</sup>, Xiang-Hai Cai<sup>b,\*</sup>

<sup>a</sup>School of Food Science and Engineering, Guangdong Province Key Laboratory for Green Processing of Natural Products and Product Safety, South China University of Technology, Guangzhou 510641, China.

<sup>b</sup>State Key Laboratory of Phytochemistry and Natural Medicines, Kunming Institute of Botany, Chinese Academy of Sciences, Kunming 650201, China.

\*Corresponding author : Email address: [baomeifen@mail.kib.ac.cn](mailto:baomeifen@mail.kib.ac.cn) (M.F Bao) or [xhcai@mail.kib.ac.cn](mailto:xhcai@mail.kib.ac.cn) (X.H. Cai).

#These authors contributed equally to this work.

## Contents

|                                                                                         |    |
|-----------------------------------------------------------------------------------------|----|
| <b>Figure 1.</b> $^1\text{H}$ NMR spectroscopic spectrum of <b>1</b> .....              | 4  |
| <b>Figure 2.</b> $^{13}\text{C}$ and DEPT NMR spectroscopic spectrum of <b>1</b> .....  | 4  |
| <b>Figure 3.</b> HSQC spectrum of <b>1</b> .....                                        | 5  |
| <b>Figure 4.</b> HMBC spectrum of <b>1</b> .....                                        | 5  |
| <b>Figure 5.</b> $^1\text{H}$ - $^1\text{H}$ COSY spectrum of <b>1</b> .....            | 6  |
| <b>Figure 6.</b> ROESY spectrum of <b>1</b> .....                                       | 6  |
| <b>Figure 7.</b> HRESIMS spectrum of <b>1</b> .....                                     | 7  |
| <b>Figure 8.</b> $^1\text{H}$ NMR spectroscopic spectrum of <b>2</b> .....              | 8  |
| <b>Figure 9.</b> $^{13}\text{C}$ and DEPT NMR spectroscopic spectrum of <b>2</b> .....  | 8  |
| <b>Figure 10.</b> HSQC spectrum of <b>2</b> .....                                       | 9  |
| <b>Figure 11.</b> HMBC spectrum of <b>2</b> .....                                       | 9  |
| <b>Figure 12.</b> $^1\text{H}$ - $^1\text{H}$ COSY spectrum of <b>2</b> .....           | 10 |
| <b>Figure 13.</b> HRESIMS spectrum of <b>2</b> .....                                    | 11 |
| <b>Figure 14.</b> $^1\text{H}$ NMR spectroscopic spectrum of <b>3</b> .....             | 12 |
| <b>Figure 15.</b> $^{13}\text{C}$ and DEPT NMR spectroscopic spectrum of <b>3</b> ..... | 12 |
| <b>Figure 16.</b> HSQC spectrum of <b>3</b> .....                                       | 13 |
| <b>Figure 17.</b> HMBC spectrum of <b>3</b> .....                                       | 13 |
| <b>Figure 18.</b> HRESIMS spectrum of.....                                              | 14 |
| <b>Figure 19.</b> $^1\text{H}$ NMR spectroscopic spectrum of <b>4</b> .....             | 15 |
| <b>Figure 20.</b> $^{13}\text{C}$ and DEPT NMR spectroscopic spectrum of <b>4</b> ..... | 15 |
| <b>Figure 21.</b> HSQC spectrum of <b>4</b> .....                                       | 16 |
| <b>Figure 22.</b> HMBC spectrum of <b>4</b> .....                                       | 16 |
| <b>Figure 23.</b> HRESIMS spectrum of <b>4</b> .....                                    | 17 |
| <b>Figure 24.</b> $^1\text{H}$ NMR spectroscopic spectrum of <b>5</b> .....             | 18 |
| <b>Figure 25.</b> $^{13}\text{C}$ and DEPT NMR spectroscopic spectrum of <b>5</b> ..... | 18 |
| <b>Figure 26.</b> HSQC spectrum of <b>5</b> .....                                       | 19 |
| <b>Figure 27.</b> HMBC spectrum of <b>5</b> .....                                       | 19 |
| <b>Figure 28.</b> $^1\text{H}$ - $^1\text{H}$ COSY spectrum of <b>5</b> .....           | 20 |
| <b>Figure 29.</b> ROESY spectrum of <b>5</b> .....                                      | 20 |
| <b>Figure 30.</b> HRESIMS spectrum of <b>5</b> .....                                    | 21 |
| <b>Figure 31.</b> $^1\text{H}$ NMR spectroscopic spectrum of <b>6</b> .....             | 22 |
| <b>Figure 32.</b> $^{13}\text{C}$ and DEPT NMR spectroscopic spectrum of <b>6</b> ..... | 22 |
| <b>Figure 33.</b> HSQC spectrum of <b>6</b> .....                                       | 23 |
| <b>Figure 34.</b> HMBC spectrum of <b>6</b> .....                                       | 23 |
| <b>Figure 35.</b> HRESIMS spectrum of <b>6</b> .....                                    | 24 |

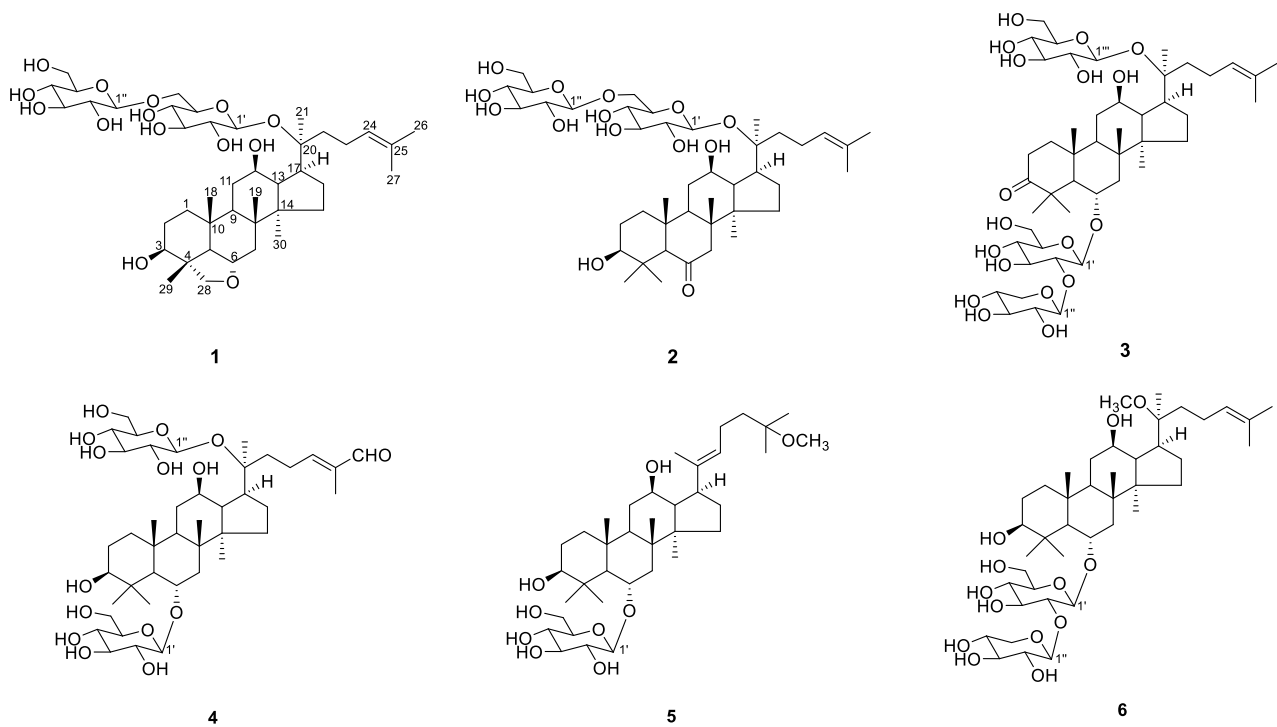

Triterpenoids saponins notoginsenoside V1-V6 (1-6) from *Panax notoginseng*

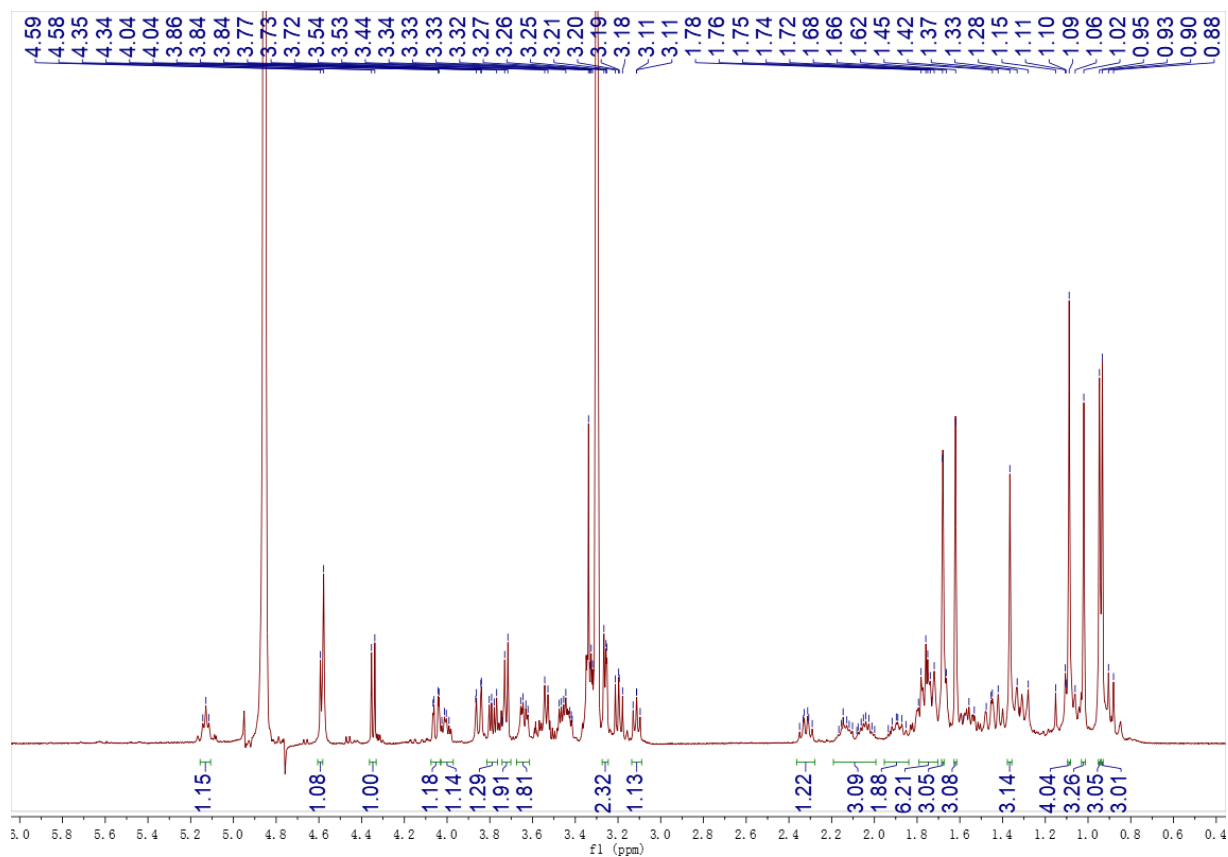

Figure 1  $^1\text{H}$  NMR spectroscopic spectrum of **1**

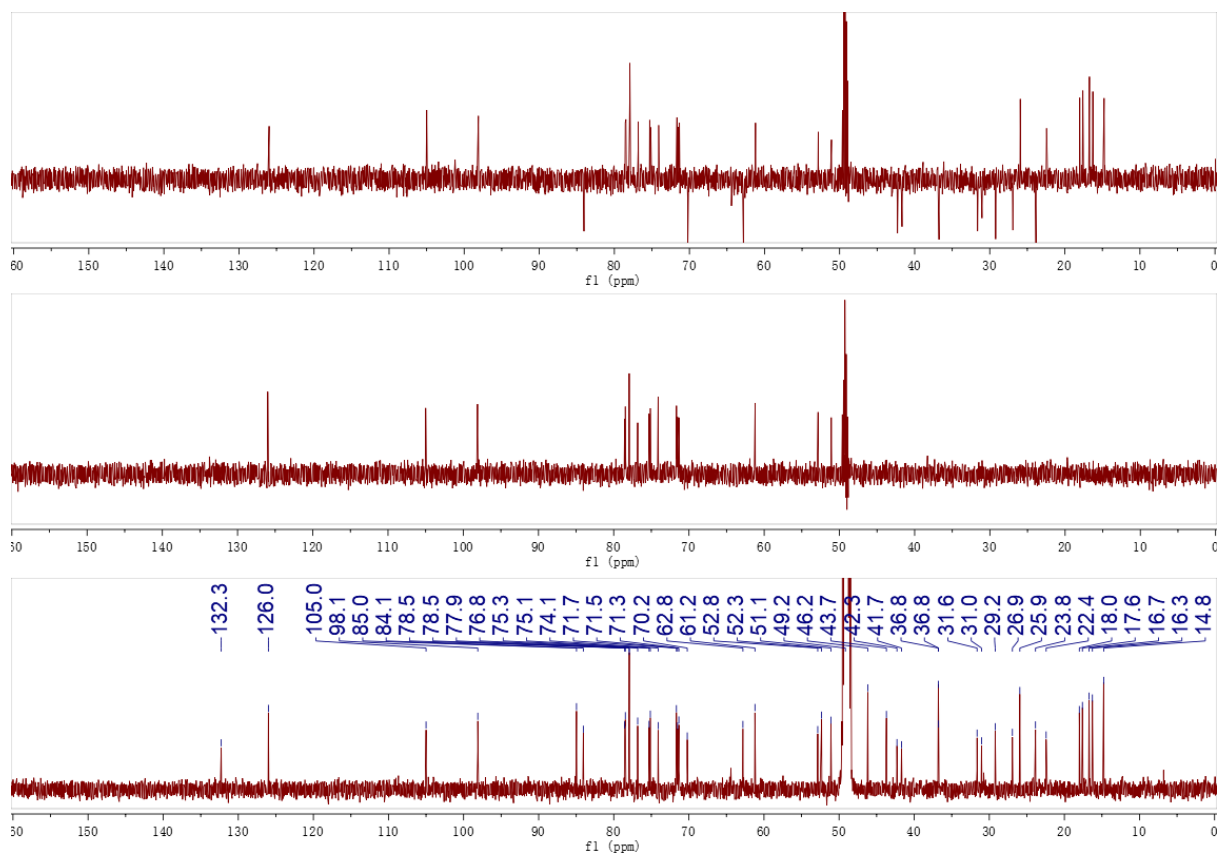

Figure 2  $^{13}\text{C}$  and DEPT NMR spectroscopic spectrum of **1**

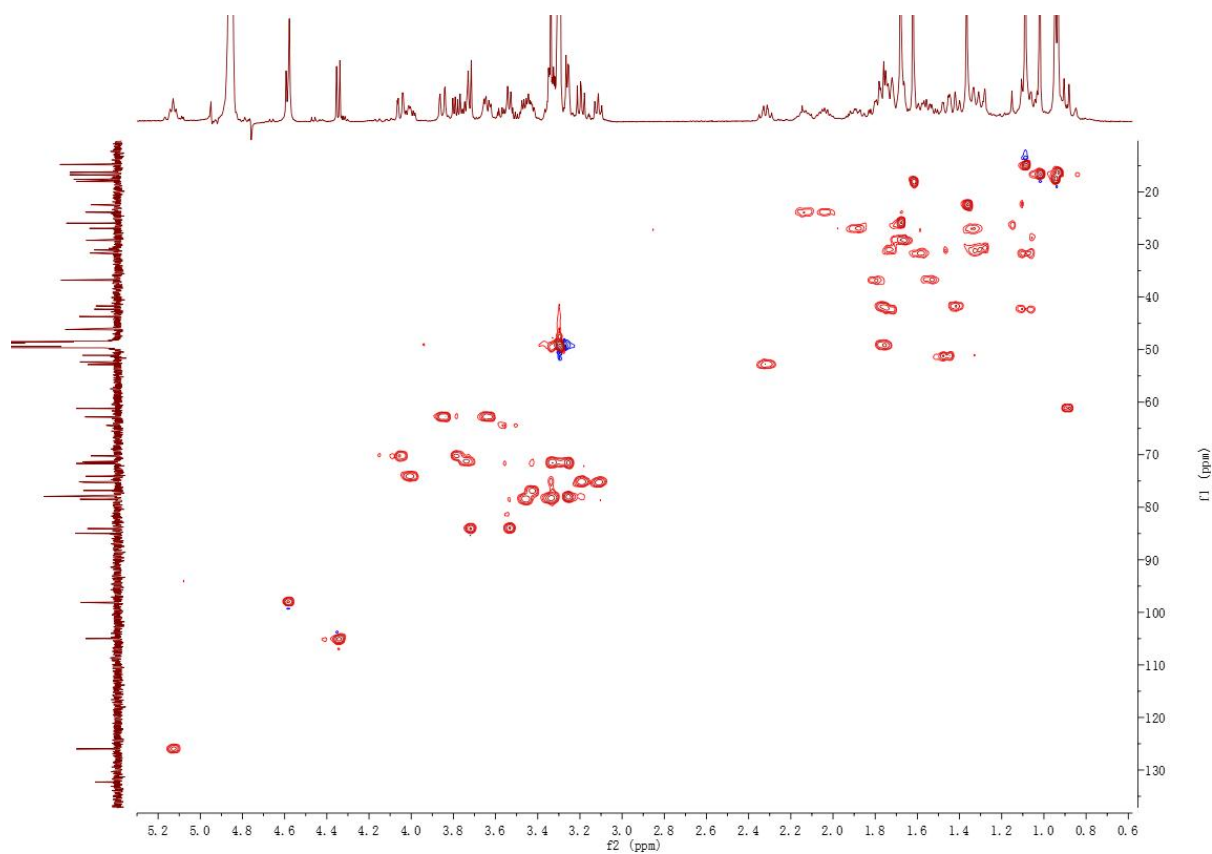

**Figure 3.** HSQC spectrum of **1**

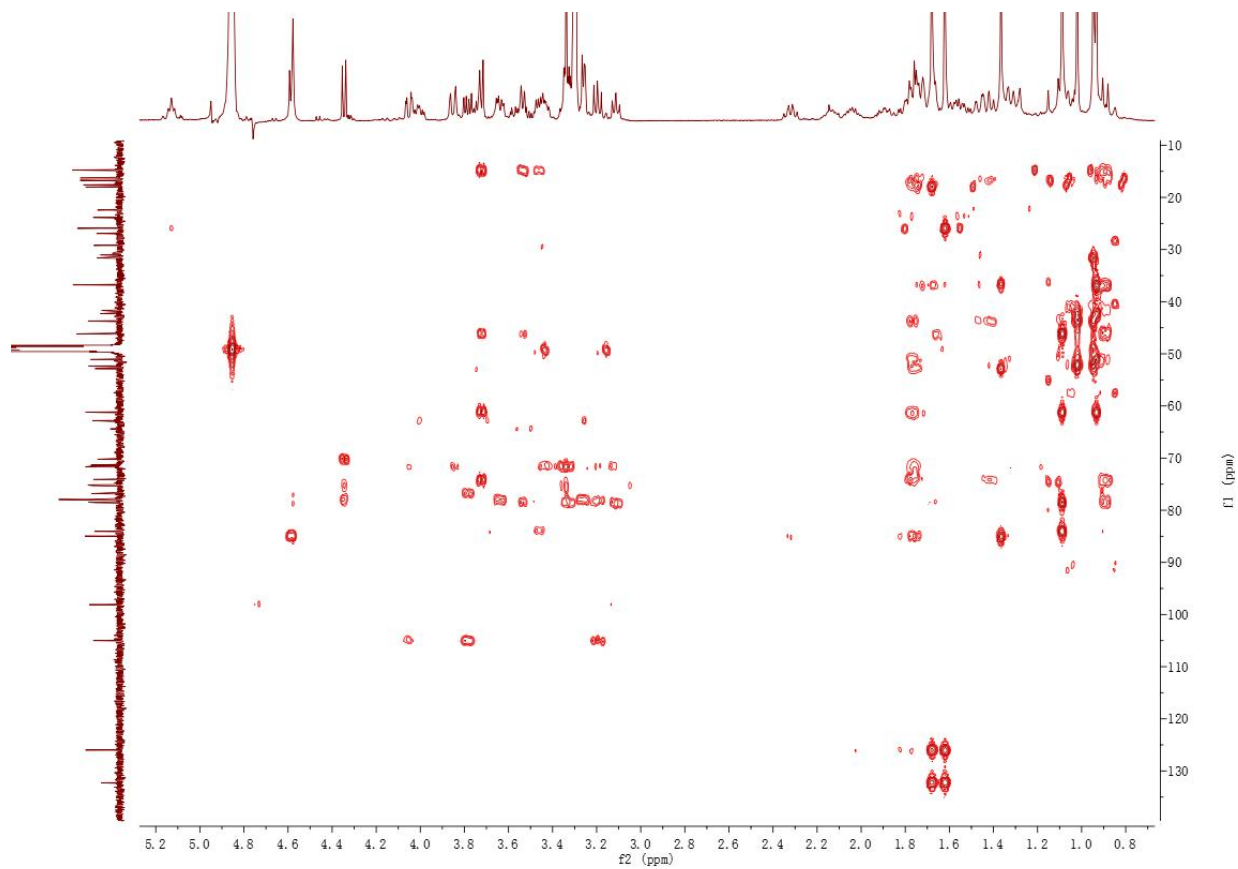

**Figure 4** HMBC spectrum of **1**

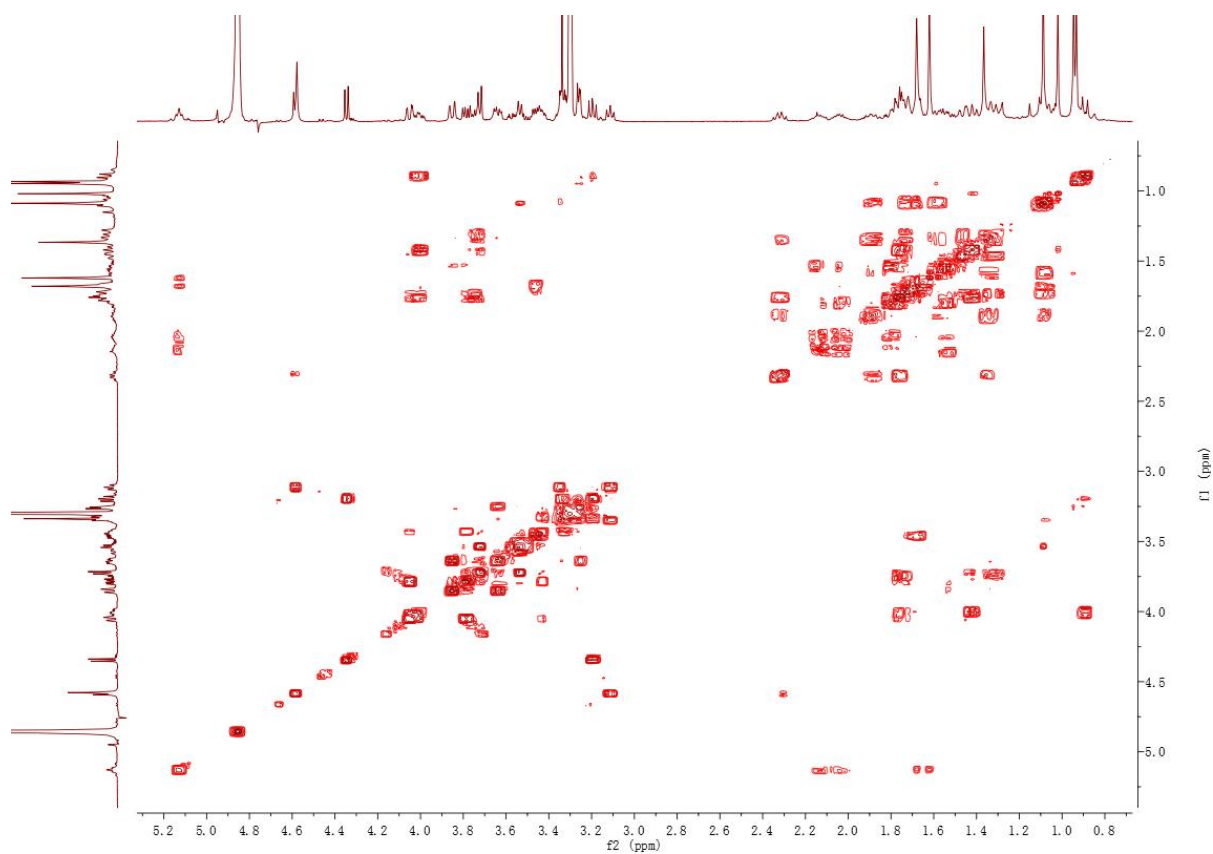

**Figure 5**  $^1\text{H}$ - $^1\text{H}$  COSY spectrum of **1**

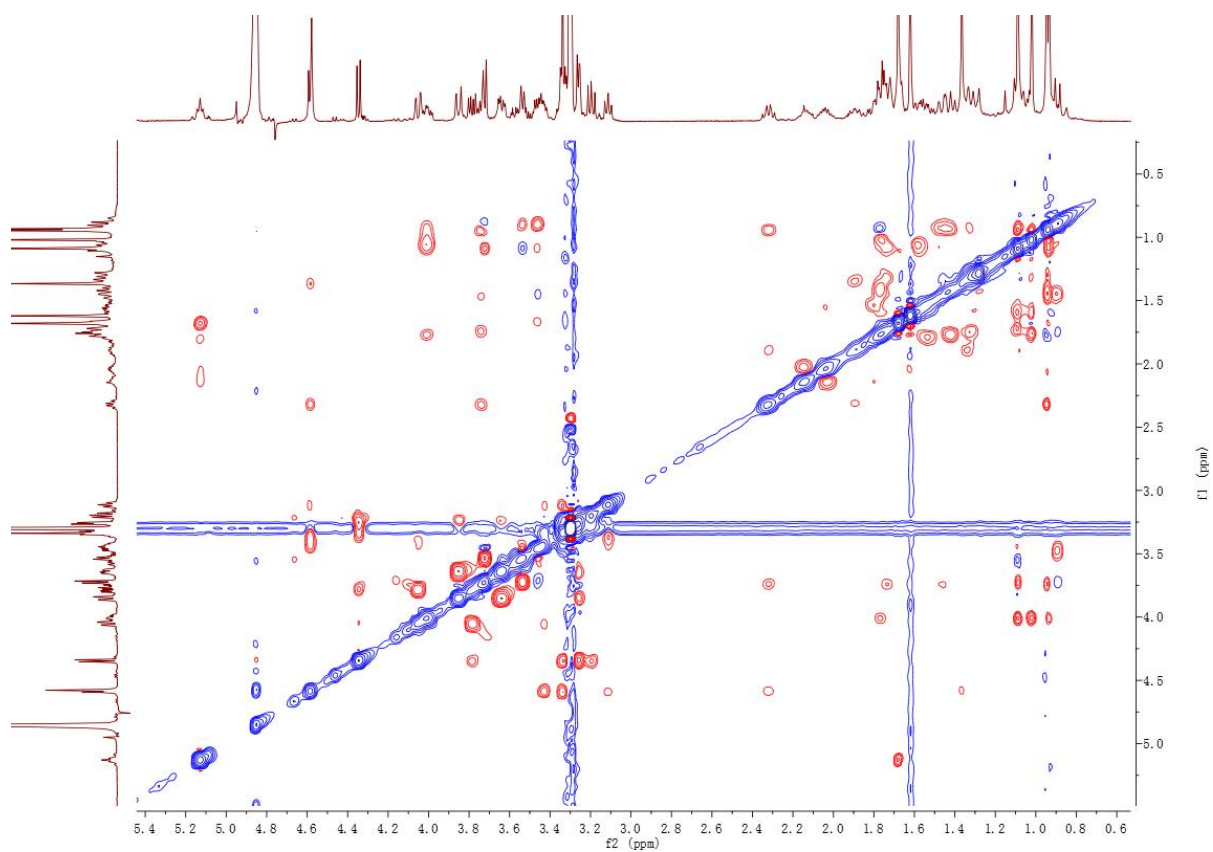

**Figure 6** ROESY spectrum of **1**

Data File: E:\DATA\2023\0818\wpr-82a.lcd

| Elmt | Val. | Min | Max | Use Adduct |
|------|------|-----|-----|------|------|-----|-----|------|------|-----|-----|------|------|-----|-----|------------|
| H    | 1    | 10  | 100 | F    | 1    | 0   | 0   | Cl   | 1    | 0   | 0   | Ag   | 1    | 0   | 0   | Na         |
| 2H   | 1    | 0   | 0   | Na   | 1    | 0   | 0   | Co   | 2    | 0   | 0   | I    | 3    | 0   | 0   |            |
| B    | 3    | 0   | 0   | Mg   | 2    | 0   | 0   | Cu   | 2    | 0   | 0   | Ir   | 3    | 0   | 0   |            |
| C    | 4    | 5   | 100 | Si   | 4    | 0   | 0   | Se   | 2    | 0   | 0   | Pt   | 2    | 0   | 0   |            |
| N    | 3    | 0   | 10  | P    | 3    | 0   | 0   | Br   | 1    | 0   | 0   |      |      |     |     |            |
| O    | 2    | 0   | 30  | S    | 2    | 0   | 0   | Pd   | 2    | 0   | 0   |      |      |     |     |            |
|      |      |     |     |      |      |     |     |      |      |     |     |      |      |     |     |            |

Error Margin (ppm): 5  
 HC Ratio: unlimited  
 Max Isotopes: all  
 MSn Iso RI (%): 75.00

DBE Range: not fixed  
 Apply N Rule: no  
 Isotope RI (%): 1.00  
 MSn Logic Mode: OR

Electron Ions: both  
 Use MSn Info: yes  
 Isotope Res: 10000  
 Max Results: 30

Event#: 1 MS(E+) Ret. Time : 0.347 -> 0.507 Scan#: 53 -> 77

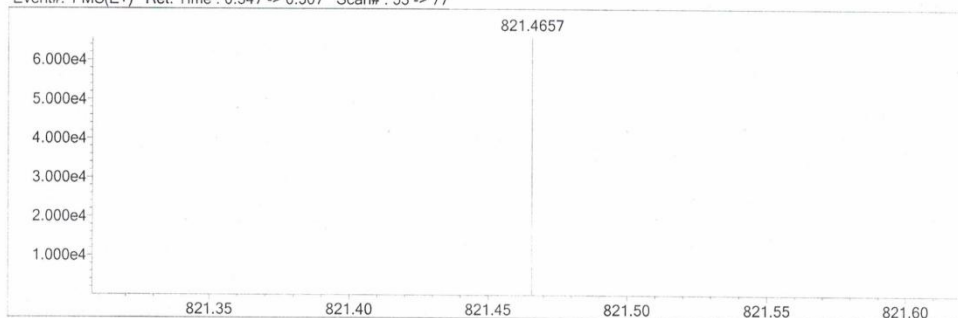

Measured region for 821.4657 m/z

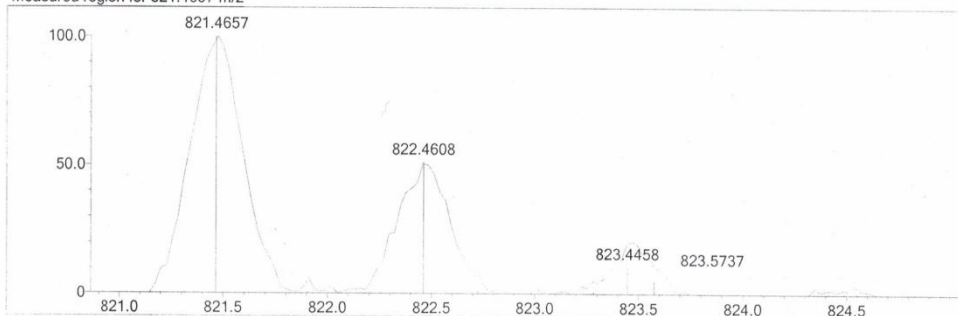

C42 H70 O14 [M+Na]+ : Predicted region for 821.4658 m/z

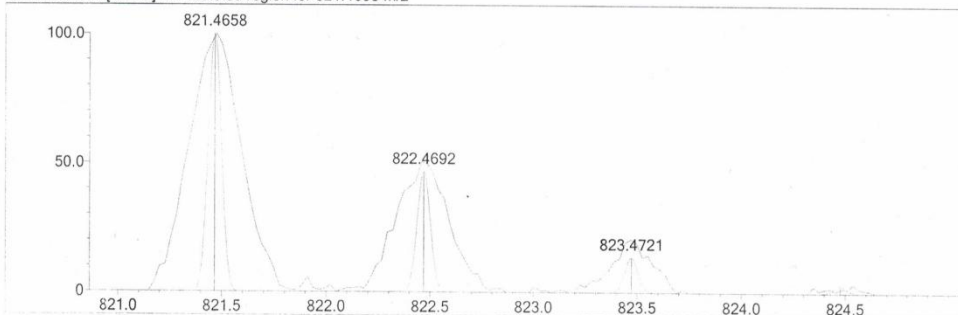

| Formula (M) | Ion     | Meas. m/z | Pred. m/z | Df. (mDa) | Df. (ppm) | DBE |
|-------------|---------|-----------|-----------|-----------|-----------|-----|
| C42 H70 O14 | [M+Na]+ | 821.4657  | 821.4658  | -0.1      | -0.12     | 8.0 |

Figure 7 HRESIMS spectrum of 1

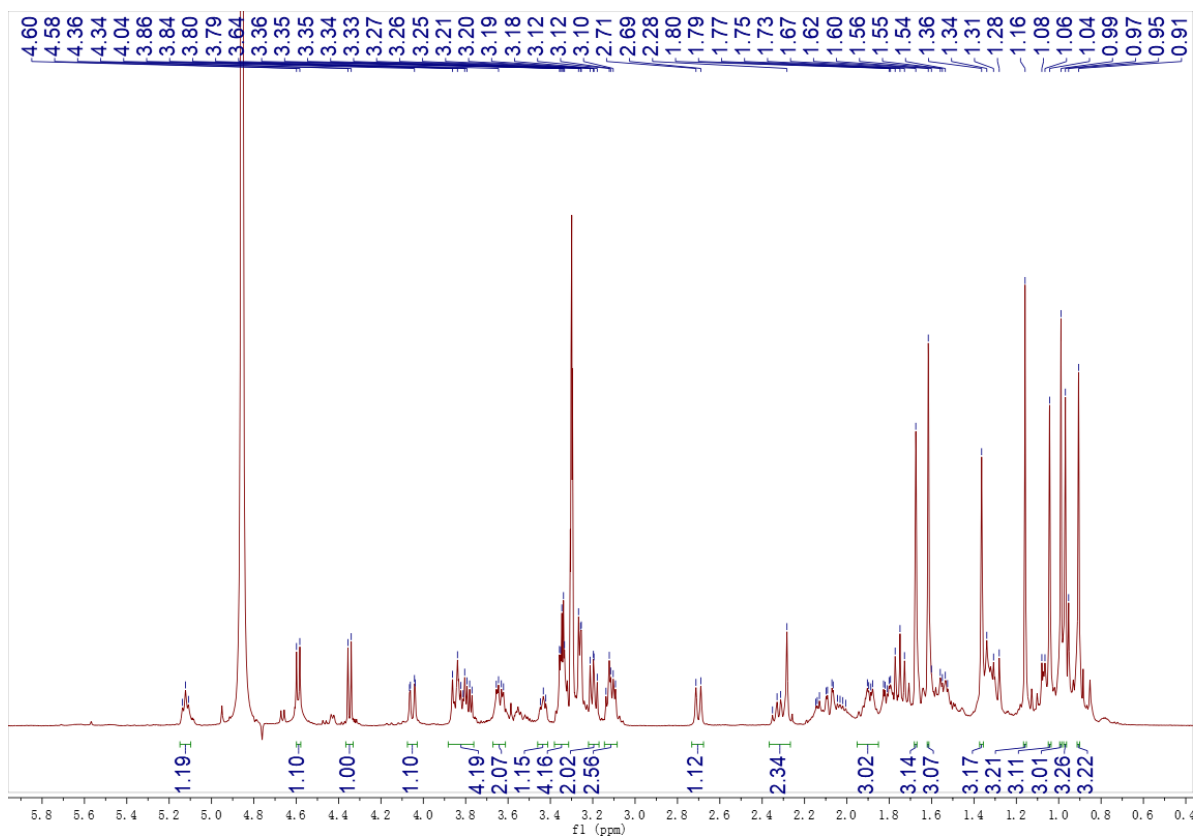

Figure 8  $^1\text{H}$  NMR spectroscopic spectrum of 2

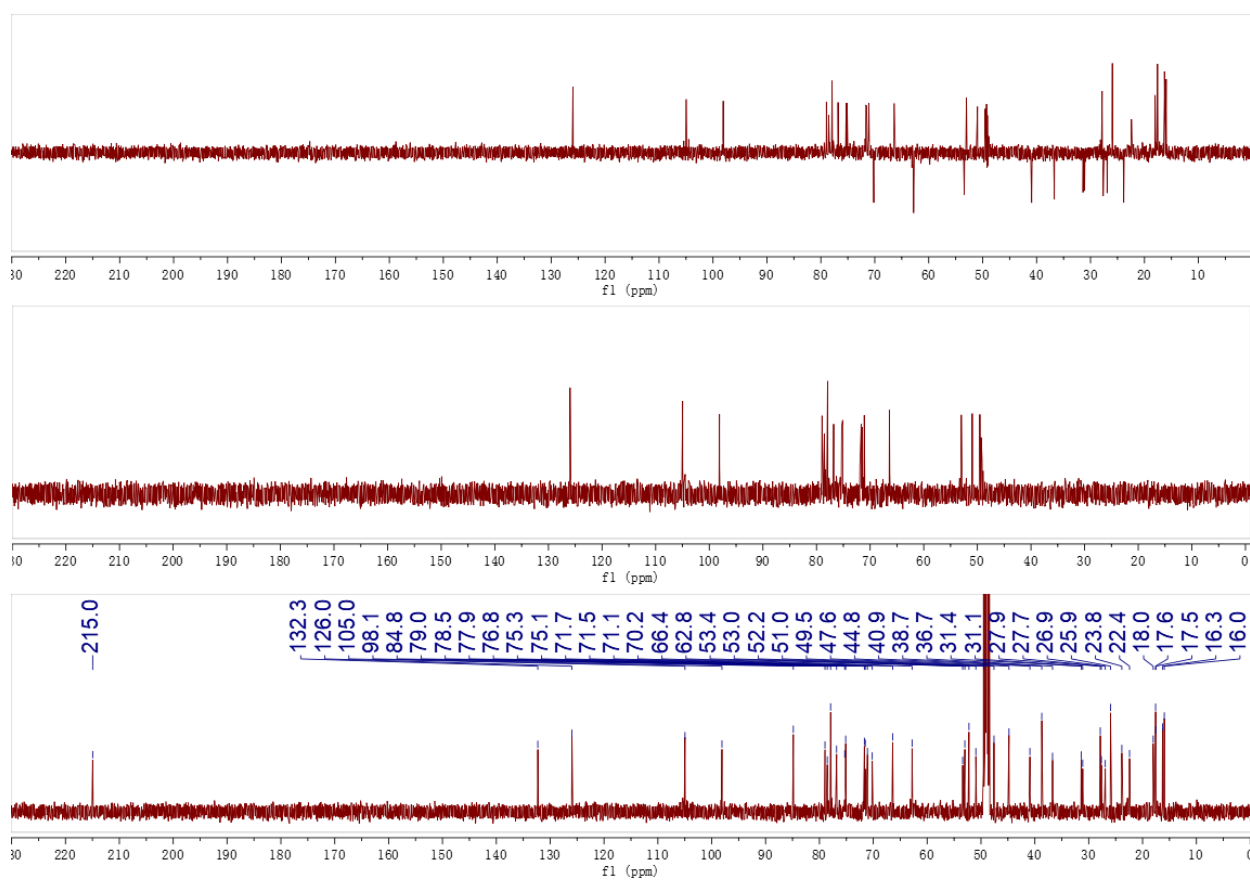

Figure 9  $^{13}\text{C}$  and DEPT NMR spectroscopic spectrum of 2

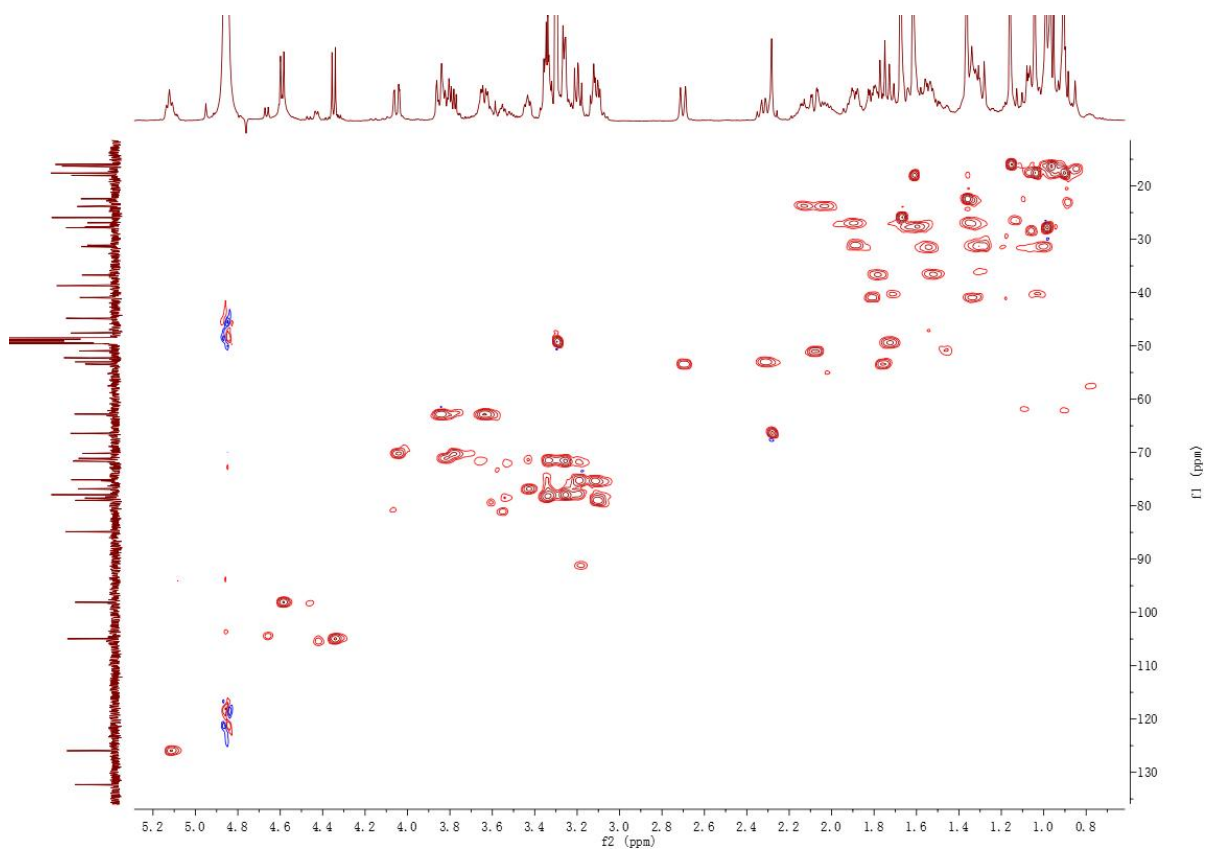

**Figure 10** HSQC spectrum of **2**

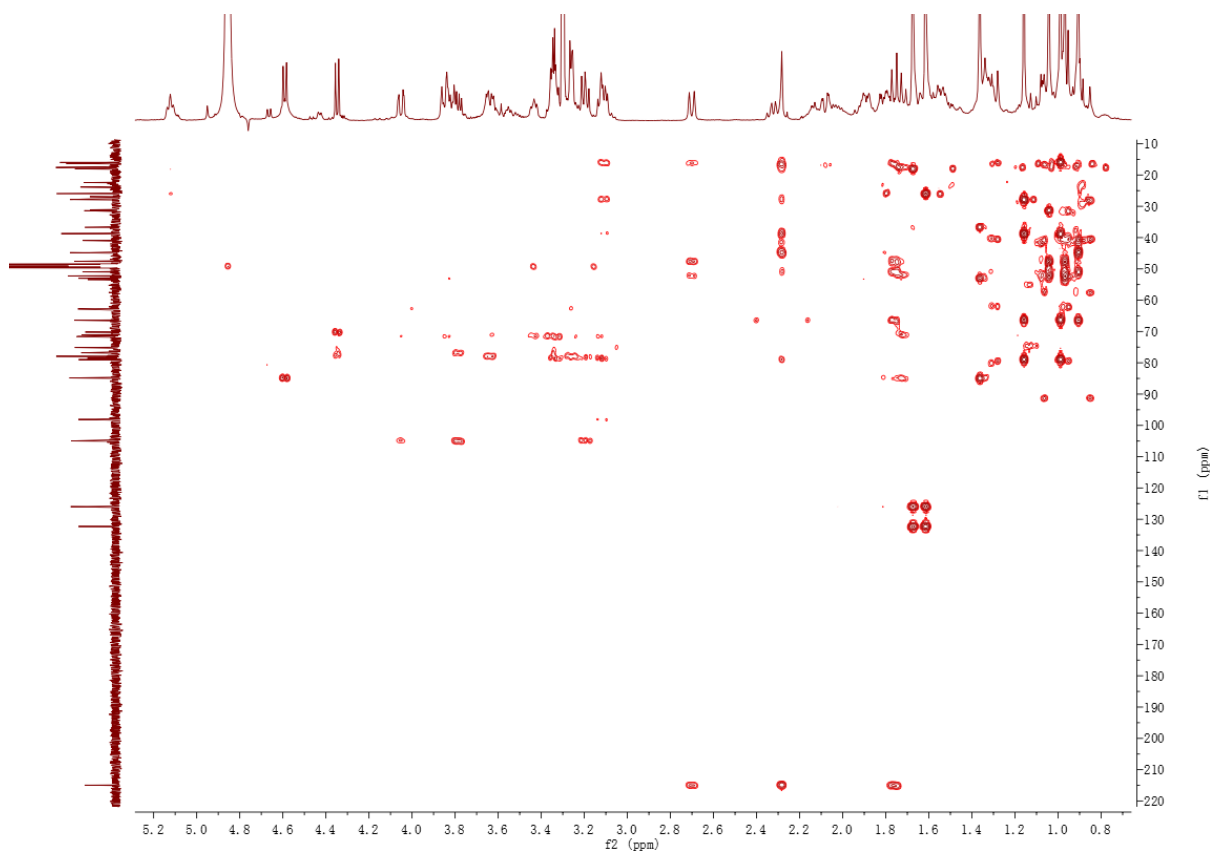

**Figure 11** HMBC spectrum of **2**

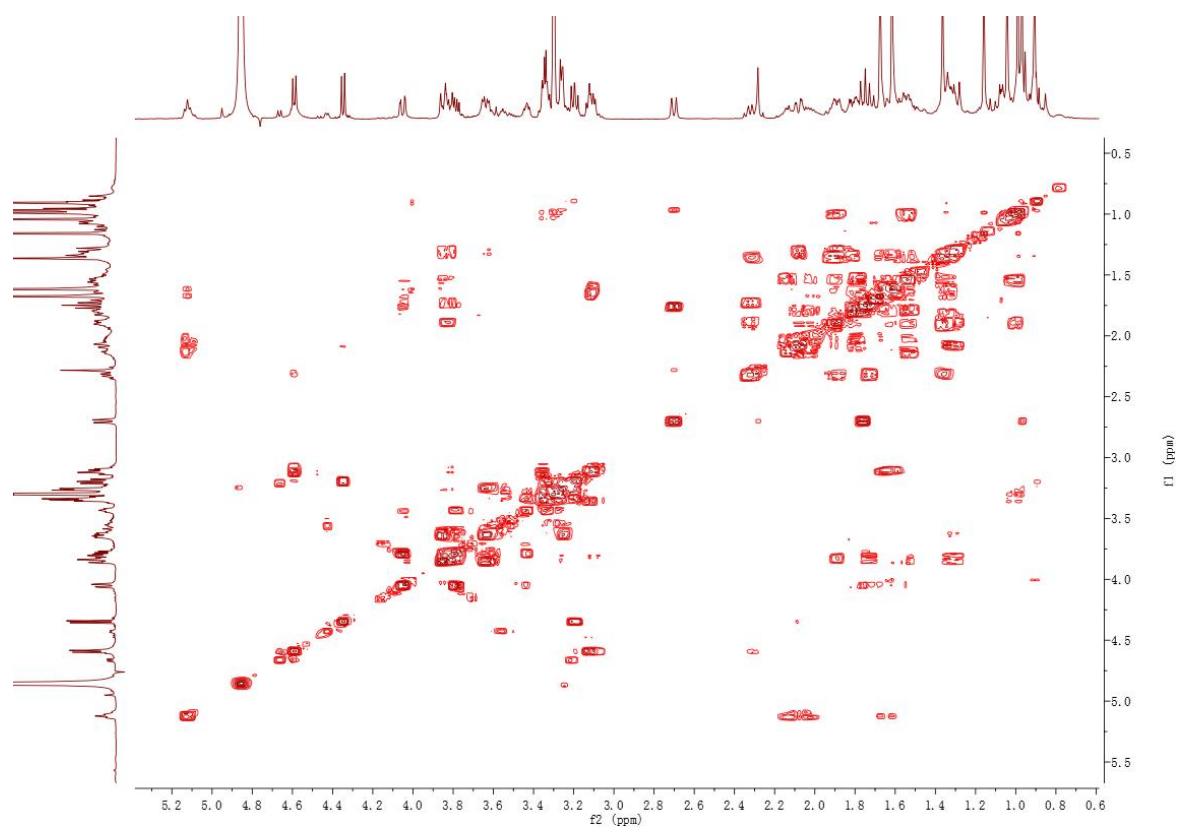

Figure 12  $^1\text{H}$ - $^1\text{H}$  COSY s spectrum of **2**

Data File: E:\DATA\2023\0818\wpn-82f.lcd

| Elmt | Val. | Min | Max | Use Adduct |
|------|------|-----|-----|------|------|-----|-----|------|------|-----|-----|------|------|-----|-----|------------|
| H    | 1    | 10  | 100 | F    | 1    | 0   | 0   | Cl   | 1    | 0   | 0   | Ag   | 1    | 0   | 0   | H          |
| 2H   | 1    | 0   | 0   | Na   | 1    | 0   | 0   | Co   | 2    | 0   | 0   | I    | 3    | 0   | 0   | HCOO       |
| B    | 3    | 0   | 0   | Mg   | 2    | 0   | 0   | Cu   | 2    | 0   | 0   | Ir   | 3    | 0   | 0   | Cl         |
| C    | 4    | 5   | 100 | Si   | 4    | 0   | 0   | Se   | 2    | 0   | 0   | Pt   | 2    | 0   | 0   |            |
| N    | 3    | 0   | 10  | P    | 3    | 0   | 0   | Br   | 1    | 0   | 0   |      |      |     |     |            |
| O    | 2    | 0   | 30  | S    | 2    | 0   | 0   | Pd   | 2    | 0   | 0   |      |      |     |     |            |

Error Margin (ppm): 5  
 HC Ratio: unlimited  
 Max Isotopes: all  
 MSn Iso RI (%): 75.00

DBE Range: not fixed  
 Apply N Rule: no  
 Isotope RI (%): 1.00  
 MSn Logic Mode: OR

Electron Ions: both  
 Use MSn Info: yes  
 Isotope Res: 10000  
 Max Results: 30

Event#: 2 MS(E-) Ret. Time : 0.373 -> 0.480 Scan# : 58 -> 74

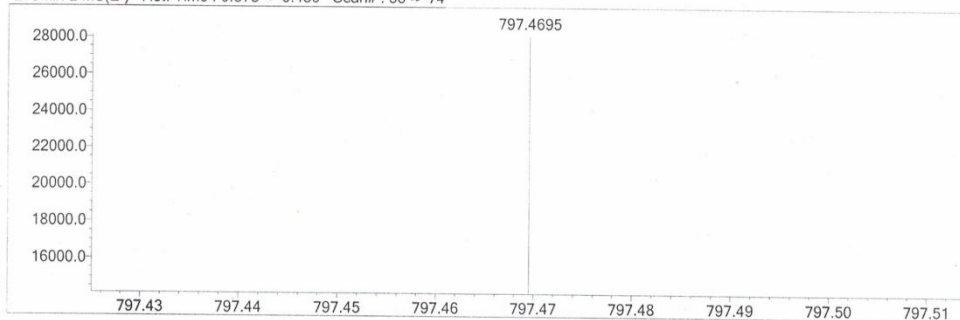

Measured region for 797.4695 m/z

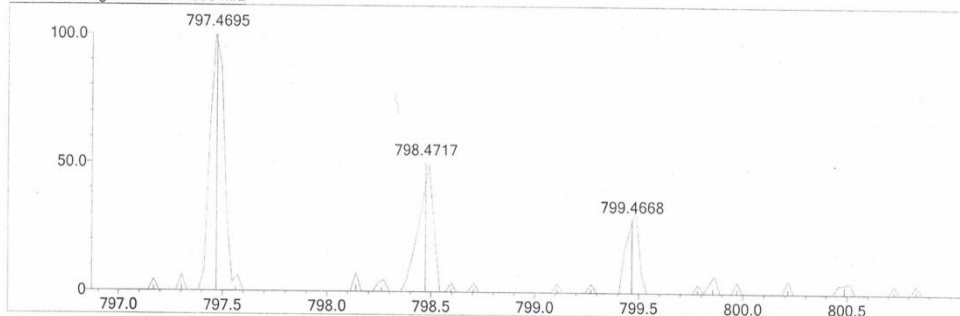

C42 H70 O14 [M-H]- : Predicted region for 797.4693 m/z

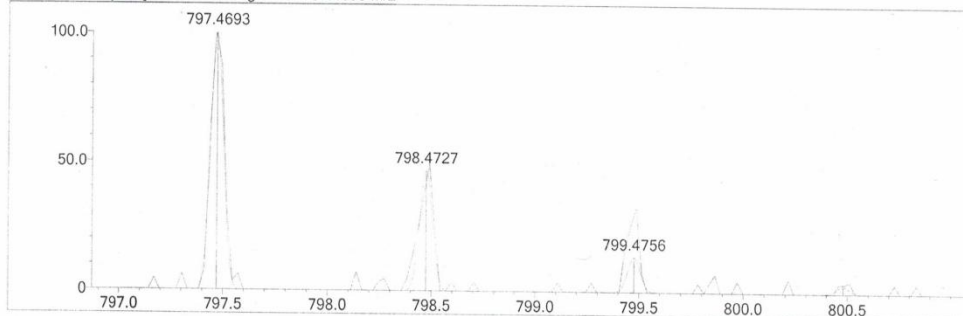

| Formula (M) | Ion    | Meas. m/z | Pred. m/z | Df. (mDa) | Df. (ppm) | DBE |
|-------------|--------|-----------|-----------|-----------|-----------|-----|
| C42 H70 O14 | [M-H]- | 797.4695  | 797.4693  | 0.2       | 0.25      | 8.0 |

Figure 13 HRESIMS spectrum of 2

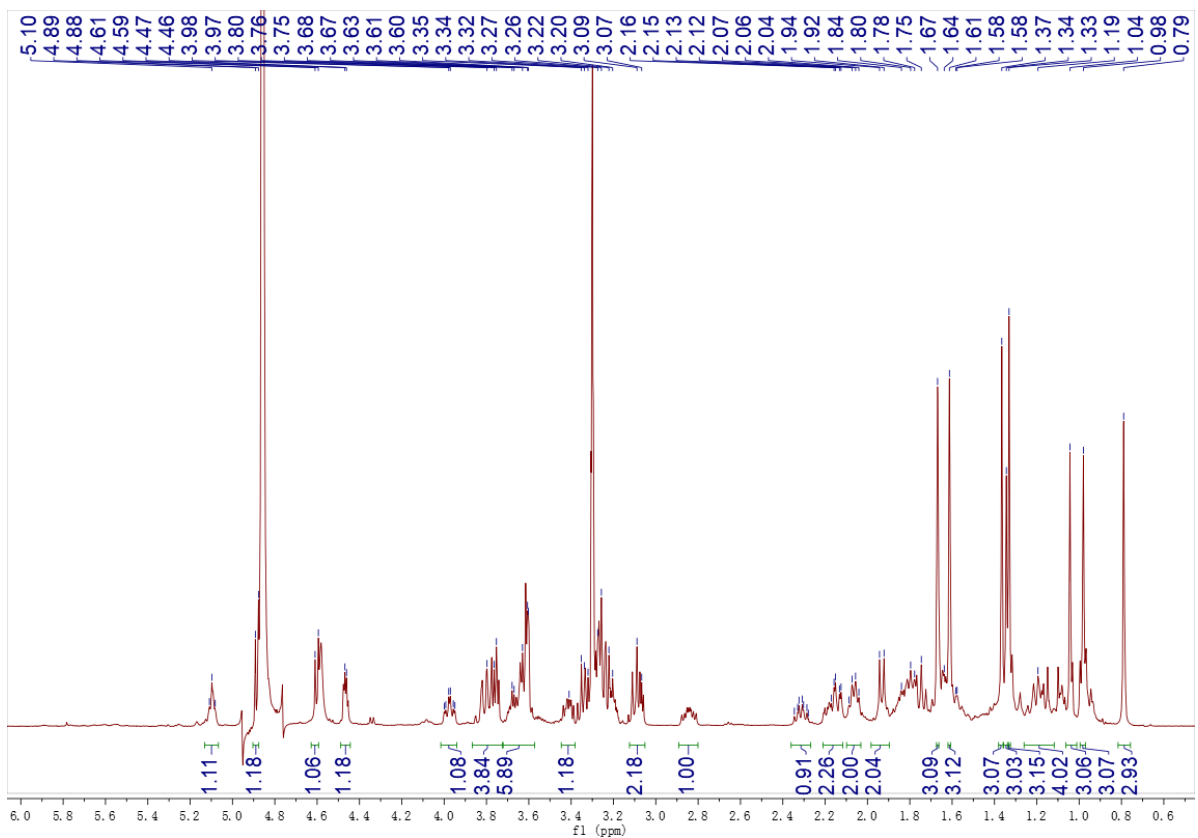

Figure 14  $^1\text{H}$  NMR spectroscopic spectrum of **3**

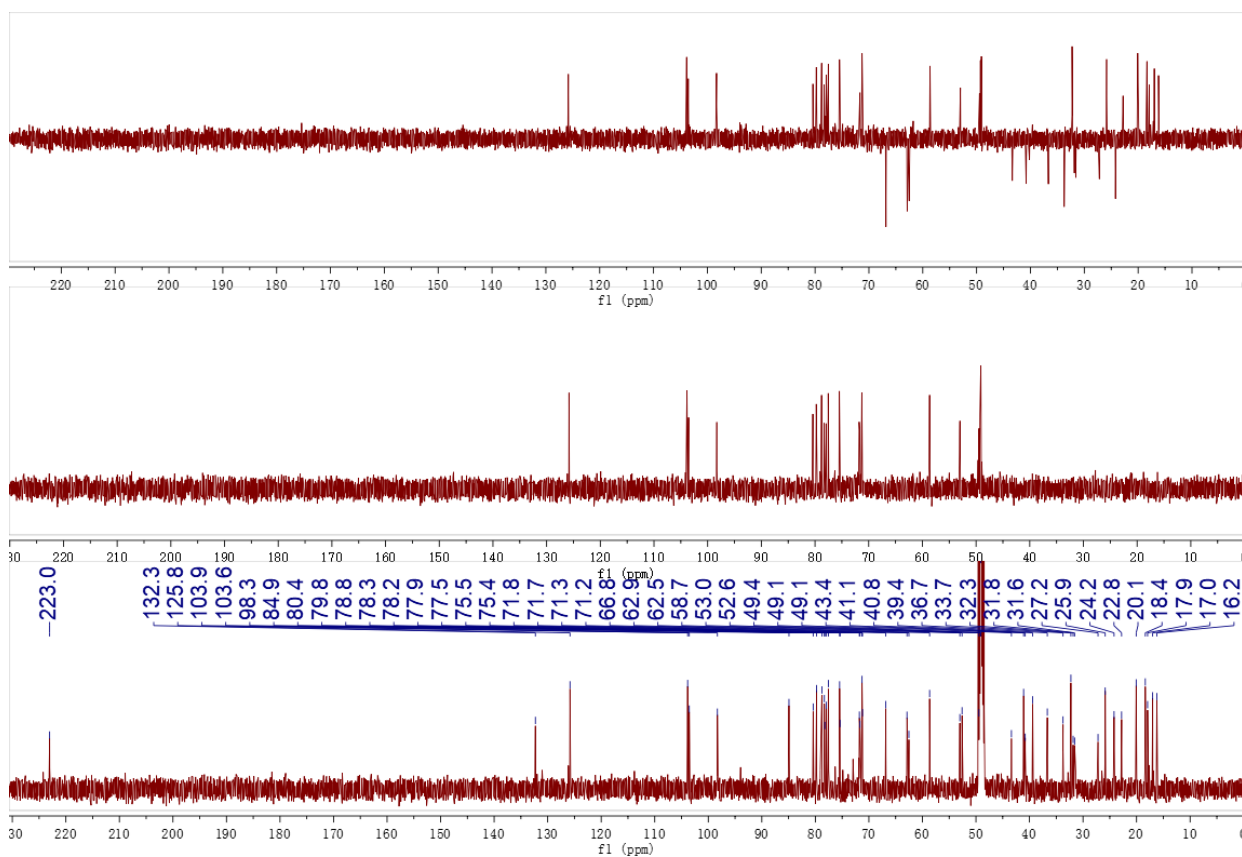

Figure 15  $^{13}\text{C}$  and DEPT NMR spectroscopic spectrum of **3**

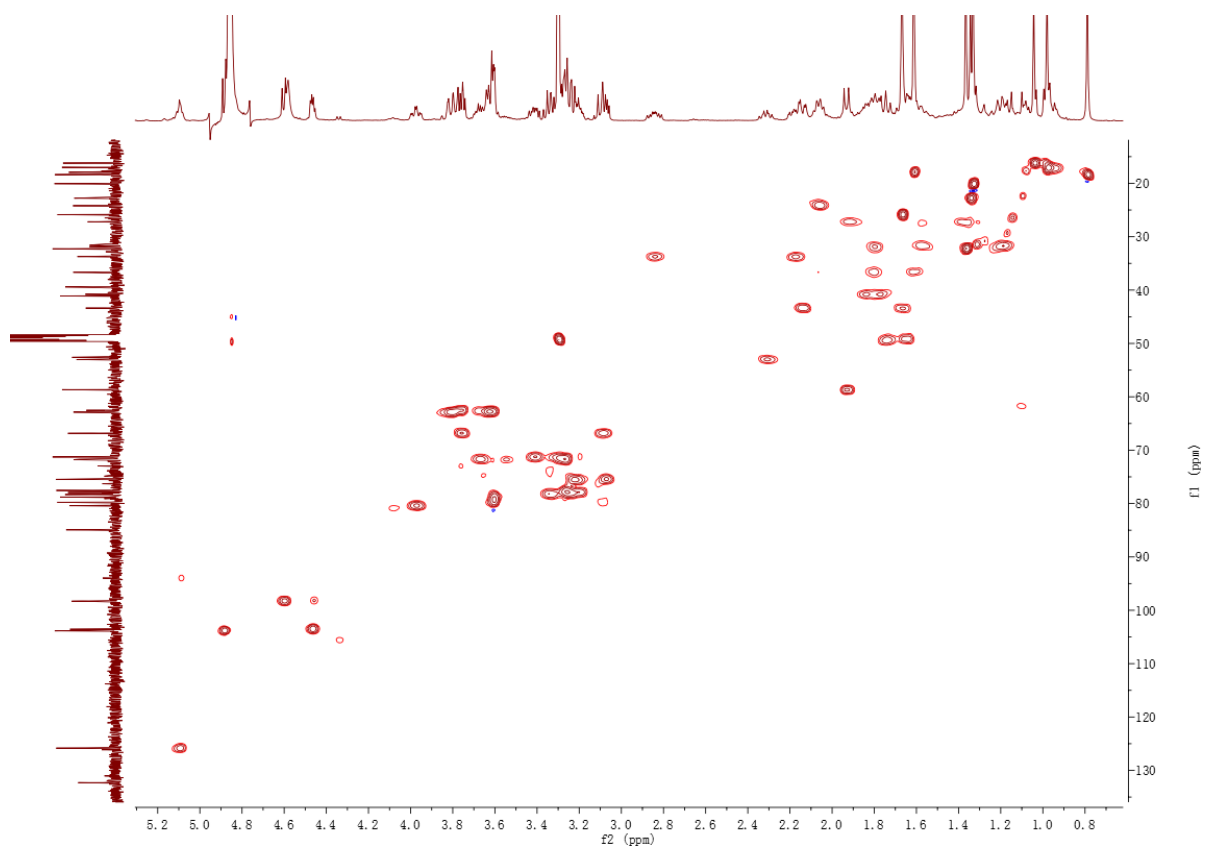

Figure 16 HSQC spectrum of 3

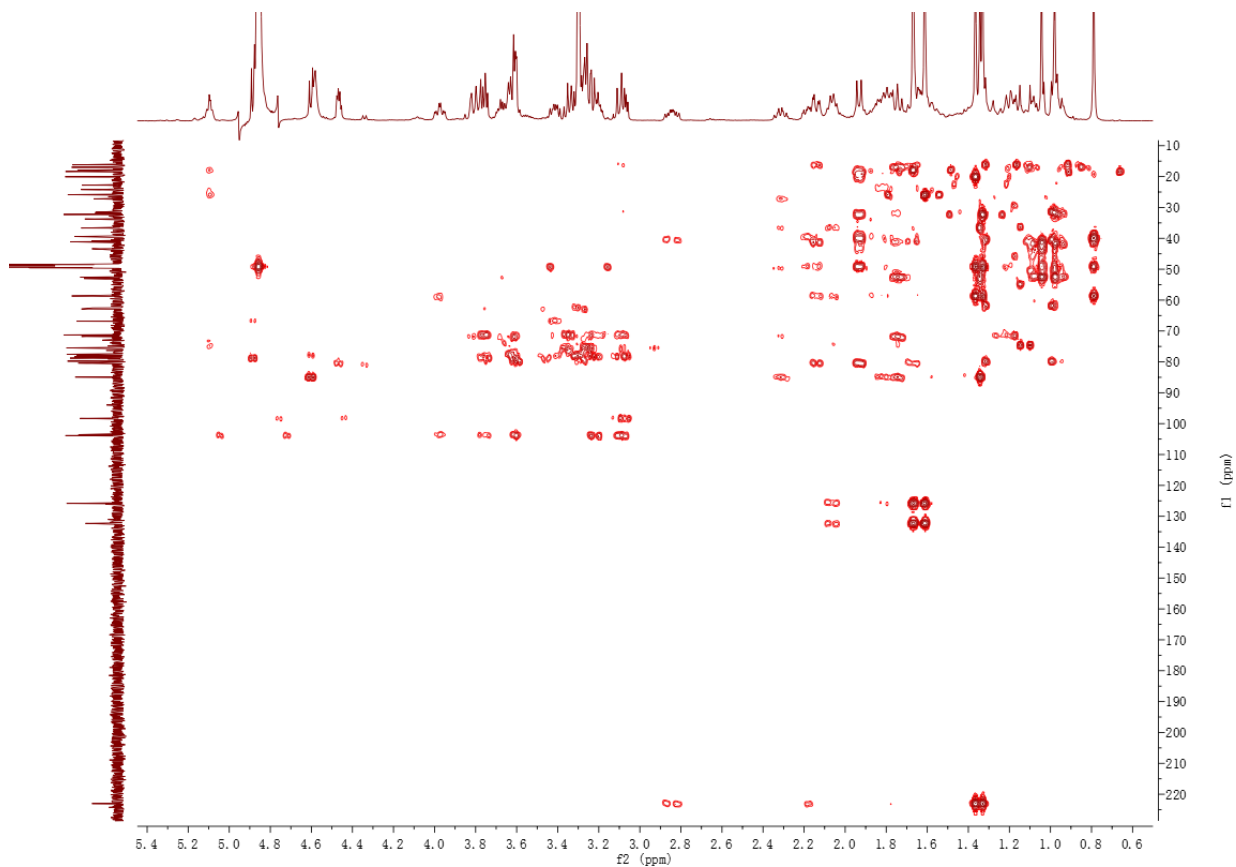

Figure 17 HMBC spectrum of 3

Data File: E:\DATA\2023\1205\2\wpn-45c.lcd

| Elmt | Val. | Min | Max | Use Adduct |
|------|------|-----|-----|------|------|-----|-----|------|------|-----|-----|------|------|-----|-----|------------|
| H    | 1    | 10  | 100 | F    | 1    | 0   | 0   | Cl   | 1    | 0   | 0   | Ag   | 1    | 0   | 0   | H          |
| 2H   | 1    | 0   | 0   | Na   | 1    | 0   | 0   | Co   | 2    | 0   | 0   | I    | 3    | 0   | 0   | Na         |
| B    | 3    | 0   | 0   | Mg   | 2    | 0   | 0   | Cu   | 2    | 0   | 0   | Ir   | 3    | 0   | 0   |            |
| C    | 4    | 5   | 100 | Si   | 4    | 0   | 0   | Se   | 2    | 0   | 0   | Pt   | 2    | 0   | 0   |            |
| N    | 3    | 0   | 10  | P    | 3    | 0   | 0   | Br   | 1    | 0   | 0   |      |      |     |     |            |
| O    | 2    | 0   | 30  | S    | 2    | 0   | 0   | Pd   | 2    | 0   | 0   |      |      |     |     |            |

Error Margin (ppm): 5  
 HC Ratio: unlimited  
 Max Isotopes: all  
 MSn Iso RI (%): 75.00

DBE Range: not fixed  
 Apply N Rule: no  
 Isotope RI (%): 1.00  
 MSn Logic Mode: OR

Electron Ions: both  
 Use MSn Info: yes  
 Isotope Res: 10000  
 Max Results: 30

Event#: 1 MS(E+) Ret. Time : 0.507 -> 0.627 Scan# : 77 -> 95

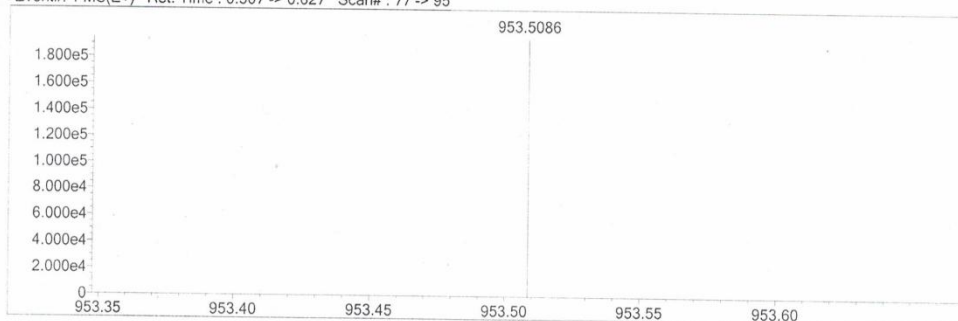

Measured region for 953.5086 m/z

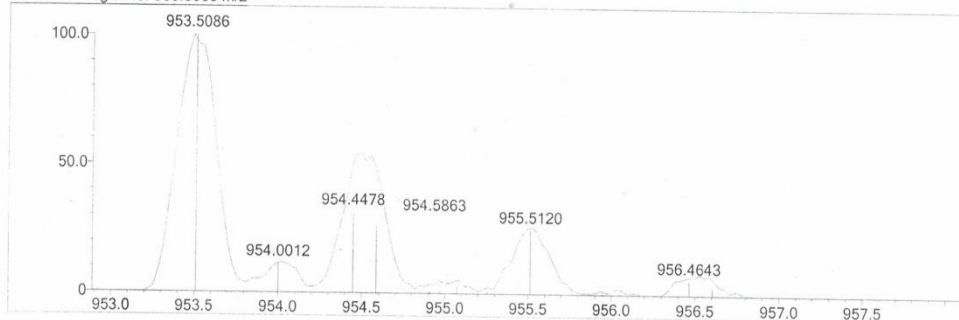

C47 H78 O18 [M+Na]+ : Predicted region for 953.5080 m/z

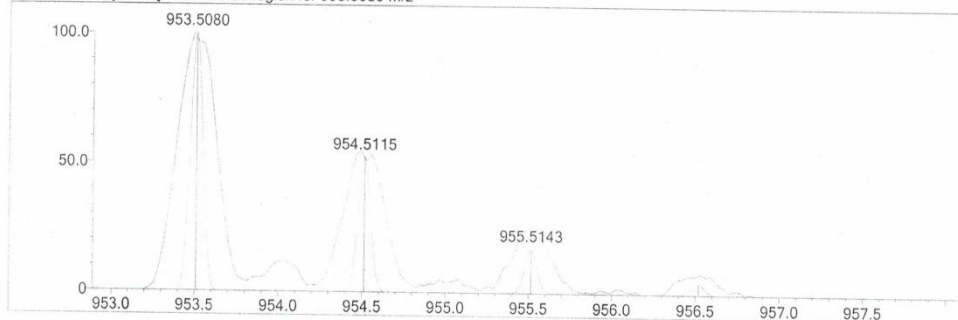

| Formula (M) | Ion     | Meas. m/z | Pred. m/z | Df. (mDa) | Df. (ppm) | DBE |
|-------------|---------|-----------|-----------|-----------|-----------|-----|
| C47 H78 O18 | [M+Na]+ | 953.5086  | 953.5080  | 0.6       | 0.63      | 9.0 |

Figure 18 HRESIMS of 3

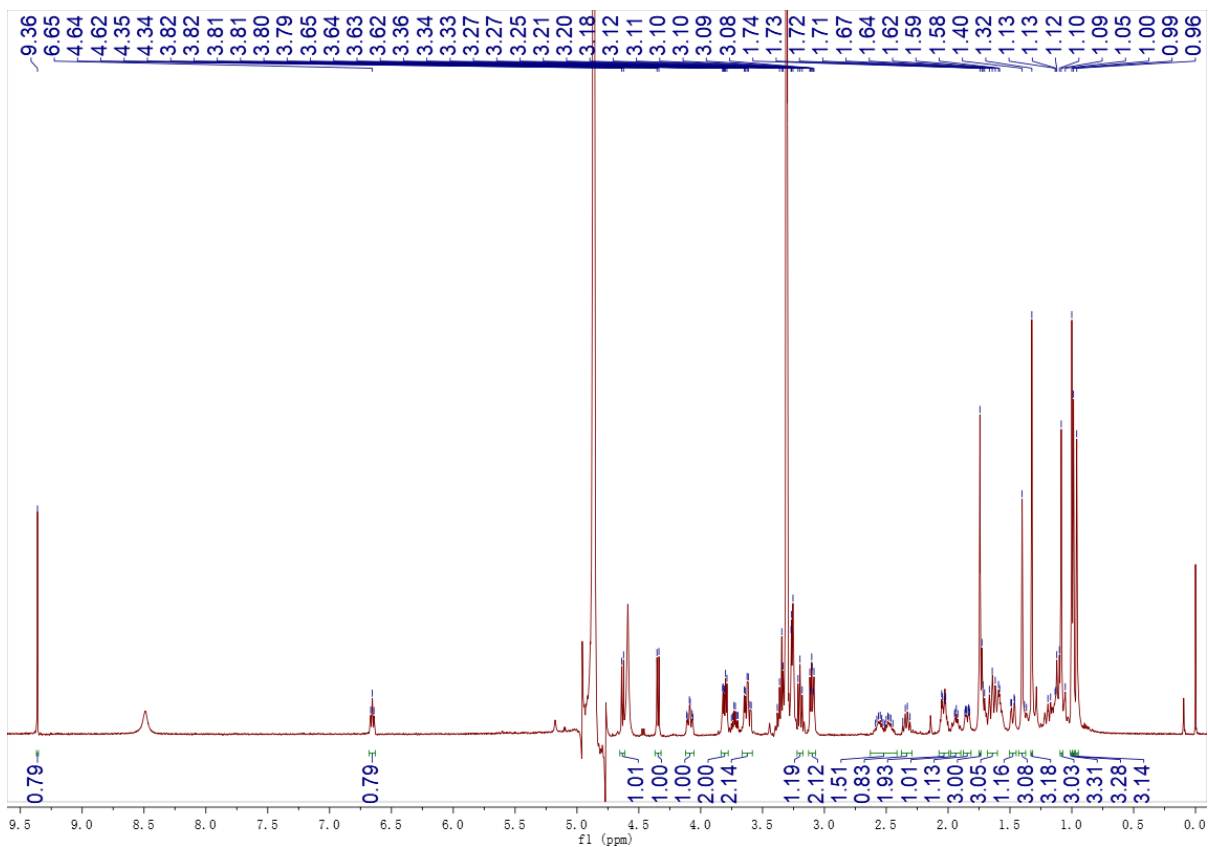

Figure 19  $^1\text{H}$  NMR spectroscopic spectrum of 4

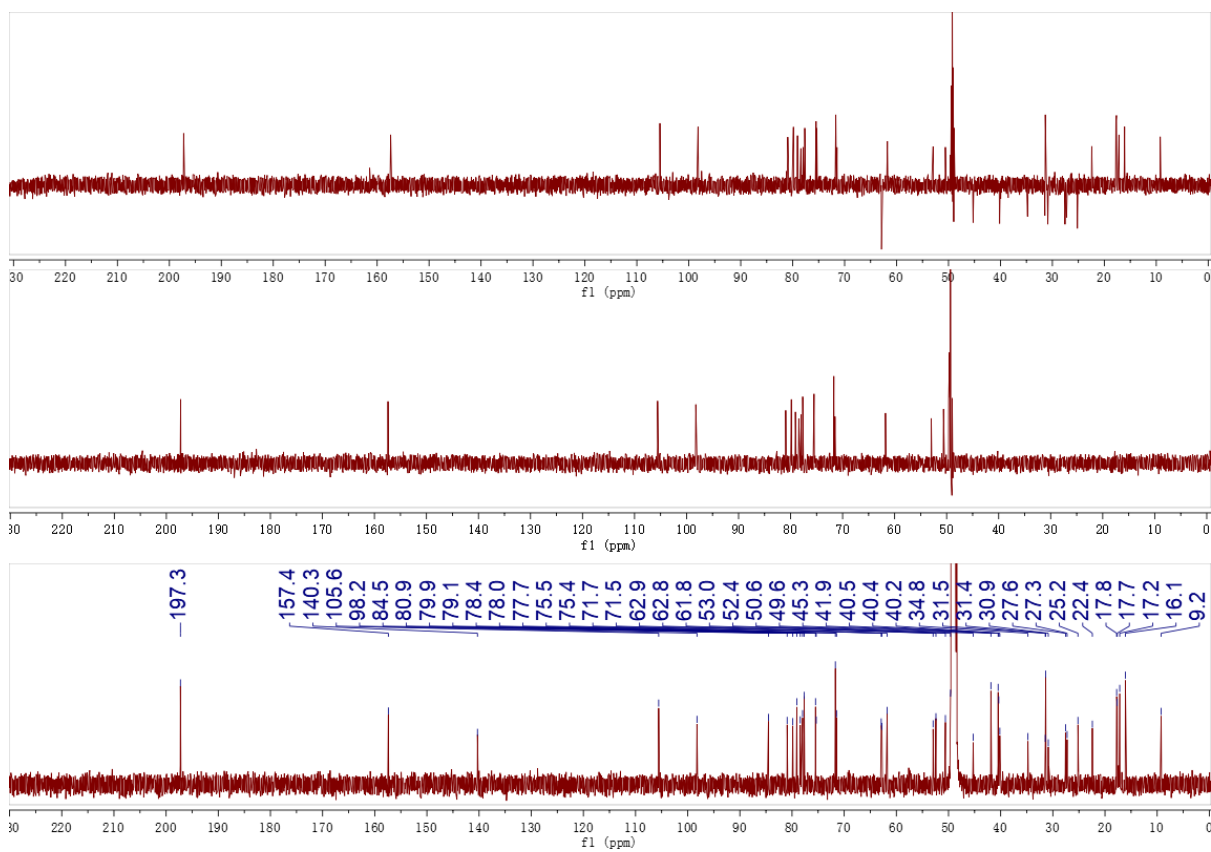

Figure 20  $^{13}\text{C}$  and DEPT NMR spectrum of 4

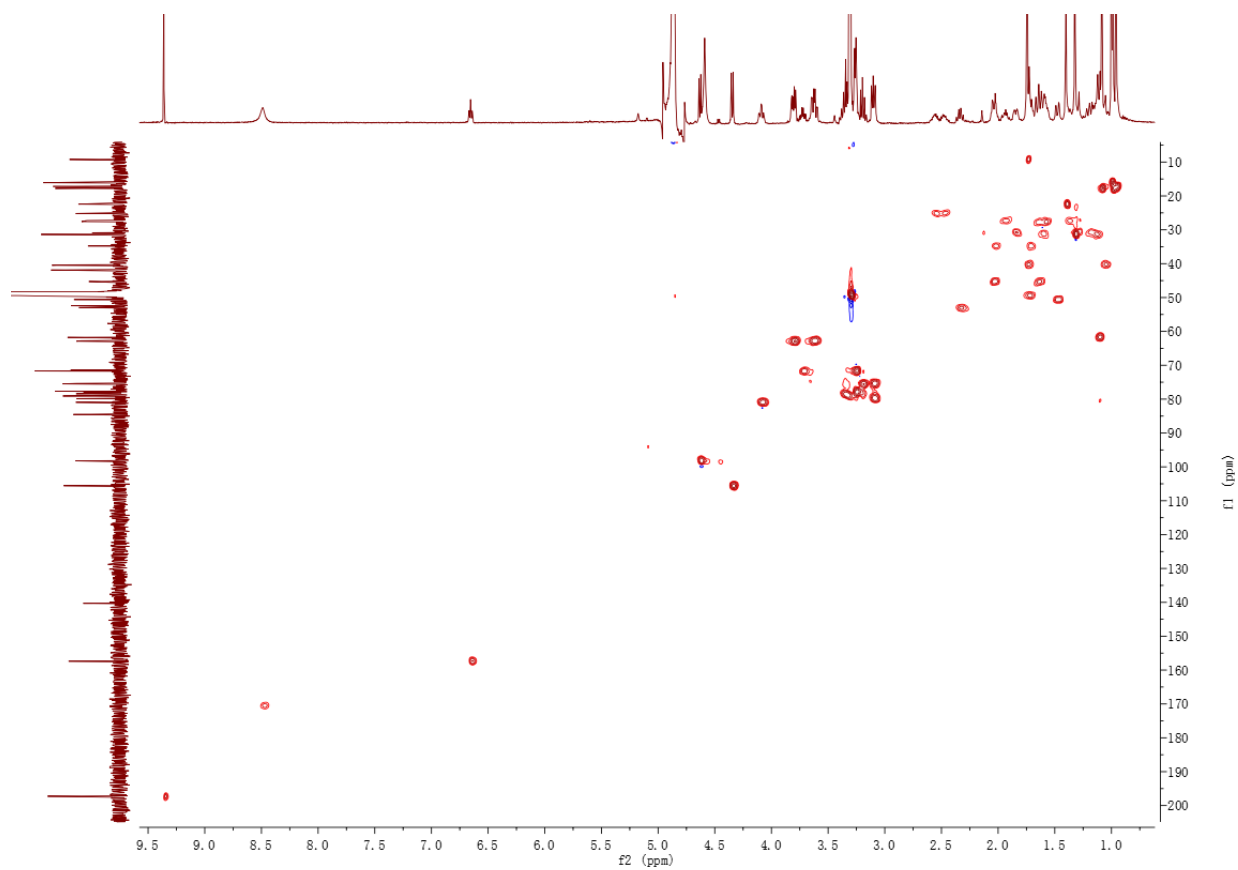

Figure 21 HSQC spectrum of 4

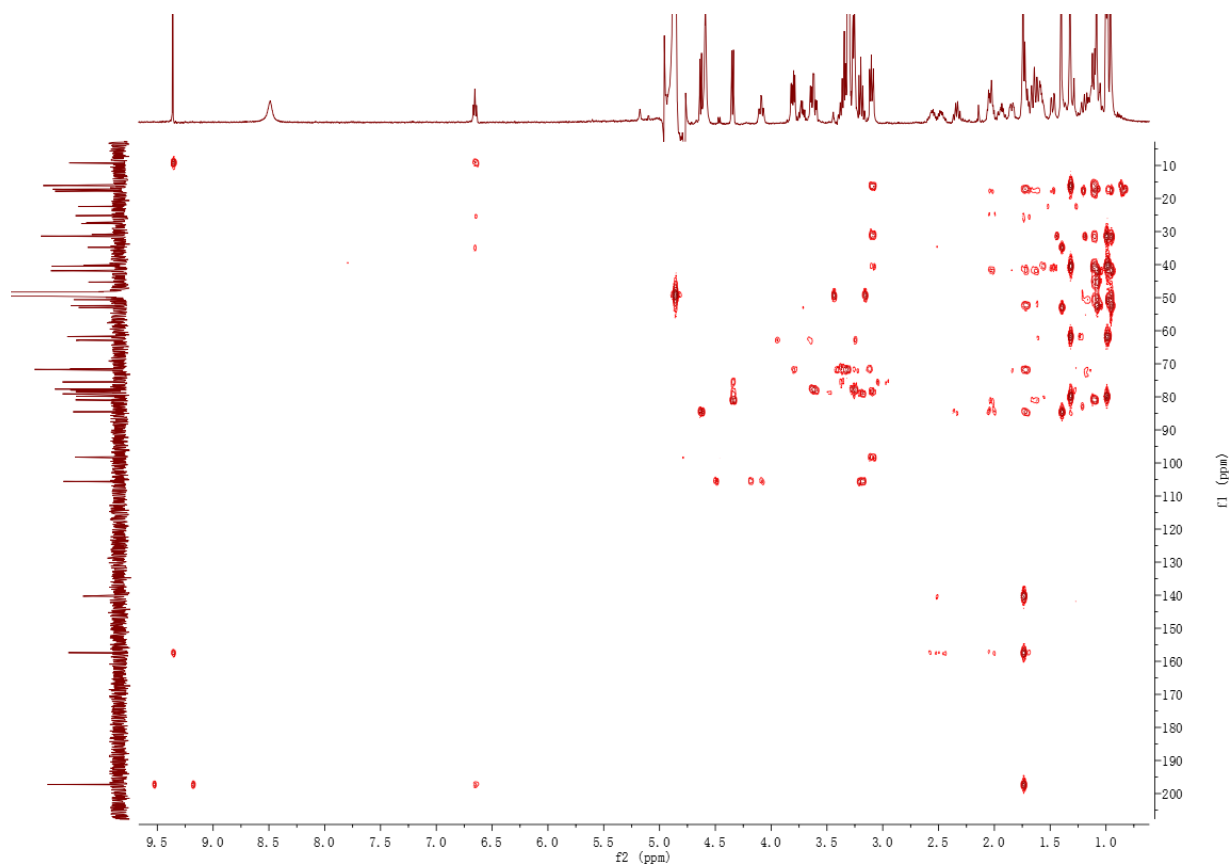

Figure 22 HMBC spectrum of 4

Data File: E:\DATA\2023\0614\wpr-62.lcd

| Elmt | Val. | Min | Max | Use Adduct |
|------|------|-----|-----|------|------|-----|-----|------|------|-----|-----|------|------|-----|-----|------------|
| H    | 1    | 10  | 100 | F    | 1    | 0   | 0   | Cl   | 1    | 0   | 0   | Ag   | 1    | 0   | 0   | Na         |
| 2H   | 1    | 0   | 0   | Na   | 1    | 0   | 0   | Co   | 2    | 0   | 0   | I    | 3    | 0   | 0   |            |
| B    | 3    | 0   | 0   | Mg   | 2    | 0   | 0   | Cu   | 2    | 0   | 0   | Ir   | 3    | 0   | 0   |            |
| C    | 4    | 5   | 100 | Si   | 4    | 0   | 0   | Se   | 2    | 0   | 0   | Pt   | 2    | 0   | 0   |            |
| N    | 3    | 0   | 10  | P    | 3    | 0   | 0   | Br   | 1    | 0   | 0   |      |      |     |     |            |
| O    | 2    | 0   | 30  | S    | 2    | 0   | 0   | Pd   | 2    | 0   | 0   |      |      |     |     |            |

Error Margin (ppm): 5  
 HC Ratio: unlimited  
 Max Isotopes: all  
 MSn Iso RI (%): 75.00

DBE Range: not fixed  
 Apply N Rule: no  
 Isotope RI (%): 1.00  
 MSn Logic Mode: OR

Electron Ions: both  
 Use MSn Info: yes  
 Isotope Res: 10000  
 Max Results: 30

Event#: 1 MS(E+) Ret. Time : 0.413 -> 0.507 Scan# : 63 -> 77

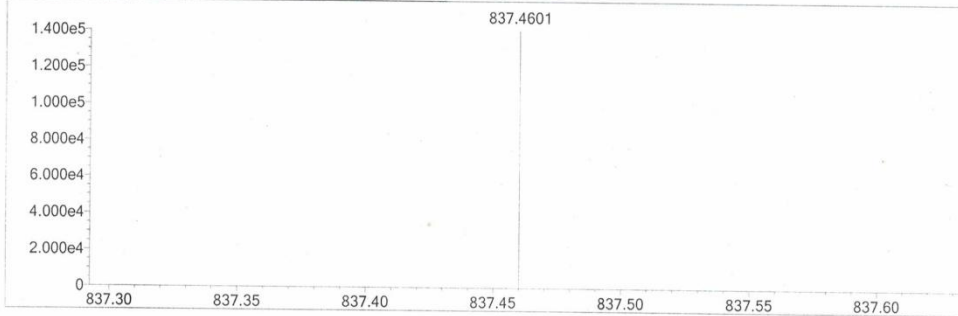

Measured region for 837.4601 m/z

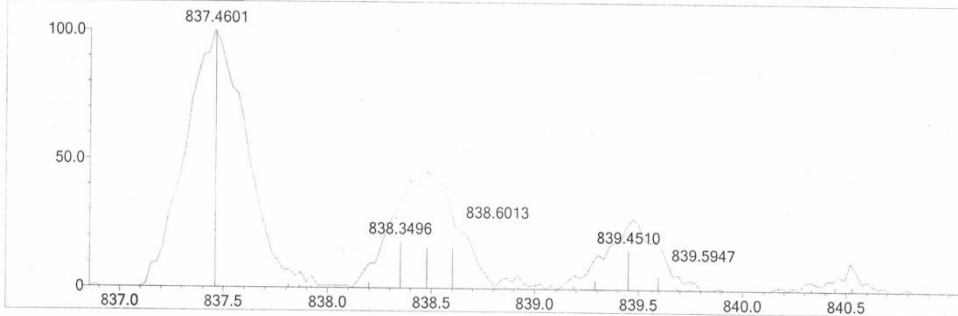

C42 H70 O15 [M+Na]+ : Predicted region for 837.4607 m/z

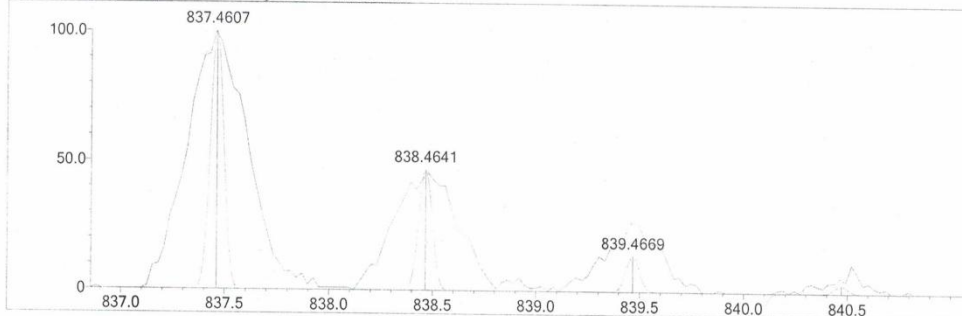

| Formula (M) | Ion     | Meas. m/z | Pred. m/z | Df. (mDa) | Df. (ppm) | DBE |
|-------------|---------|-----------|-----------|-----------|-----------|-----|
| C42 H70 O15 | [M+Na]+ | 837.4601  | 837.4607  | -0.6      | -0.72     | 8.0 |

Figure 23 HRMS spectrum of 4

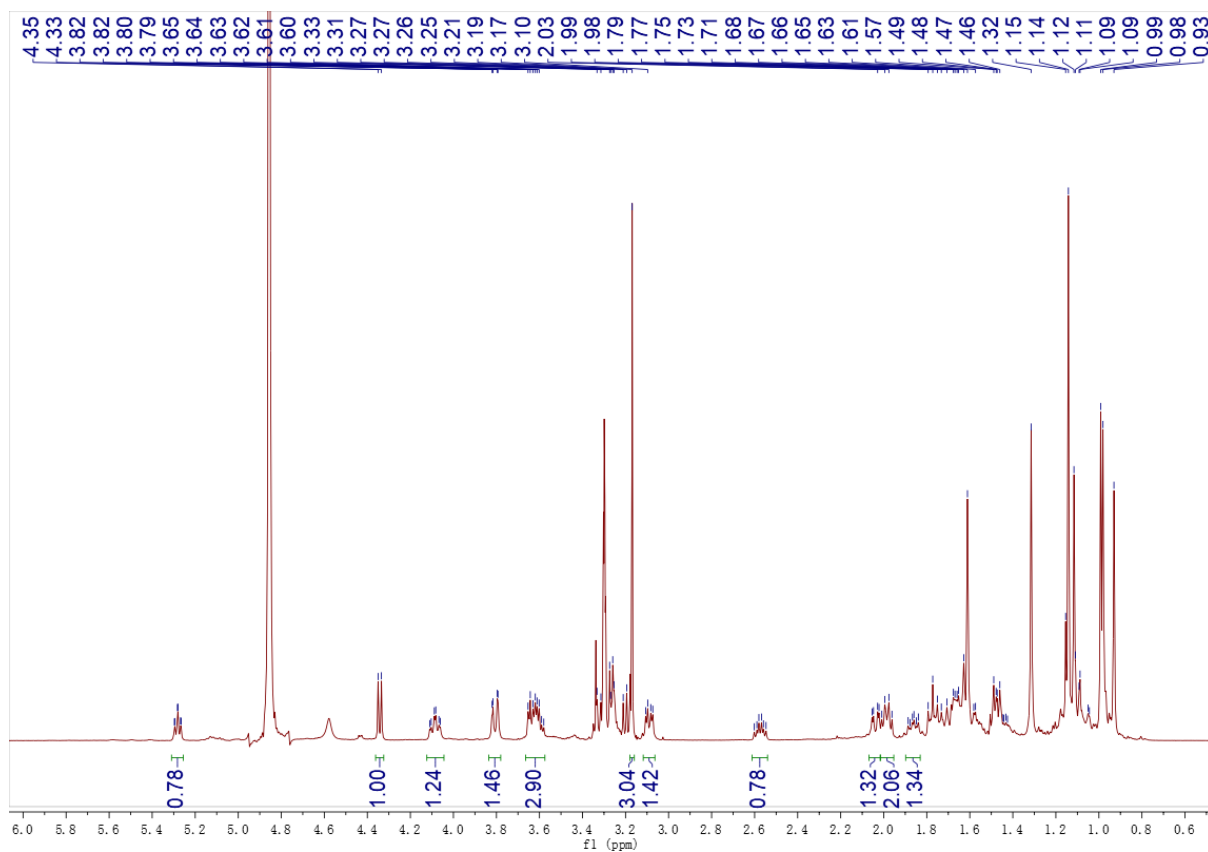

Figure 24  $^1\text{H}$  NMR spectroscopic spectrum of **5**

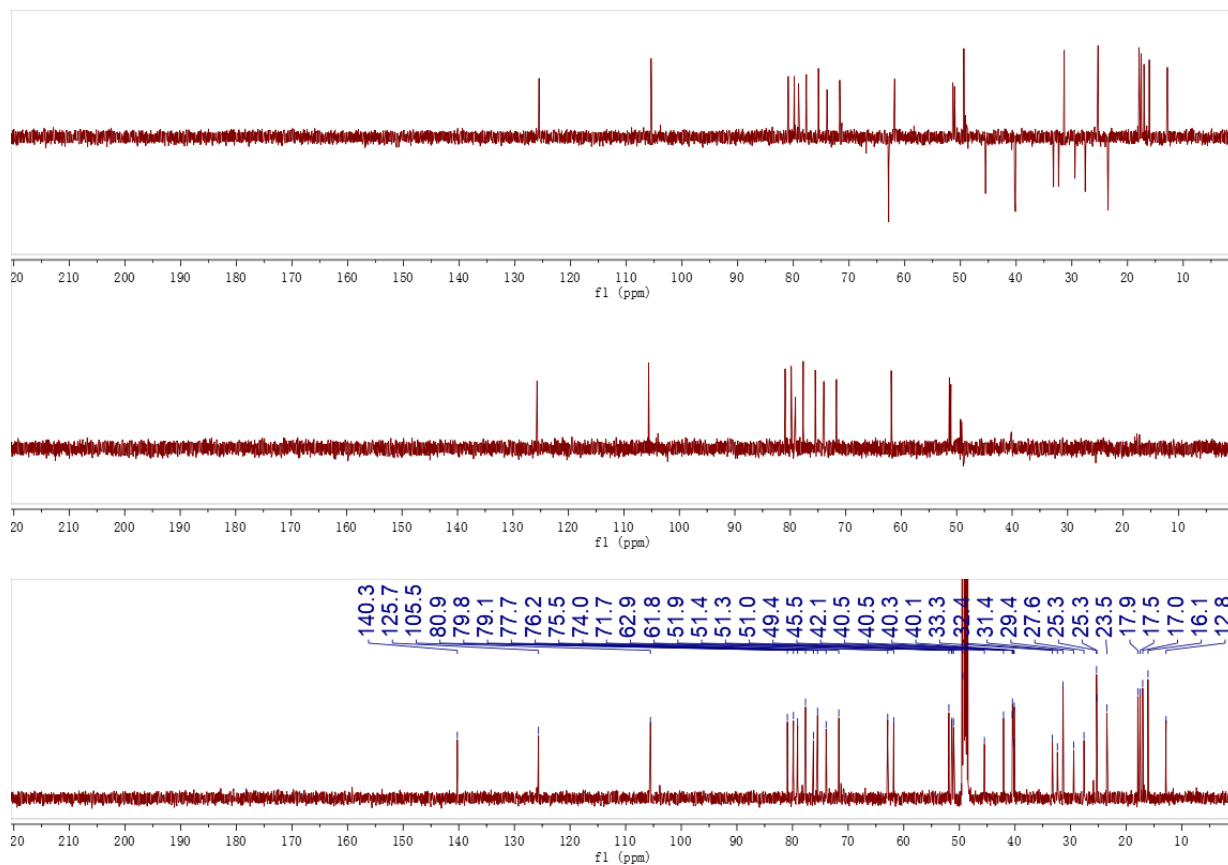

Figure 25  $^{13}\text{C}$  and DEPT NMR spectrum of **5**

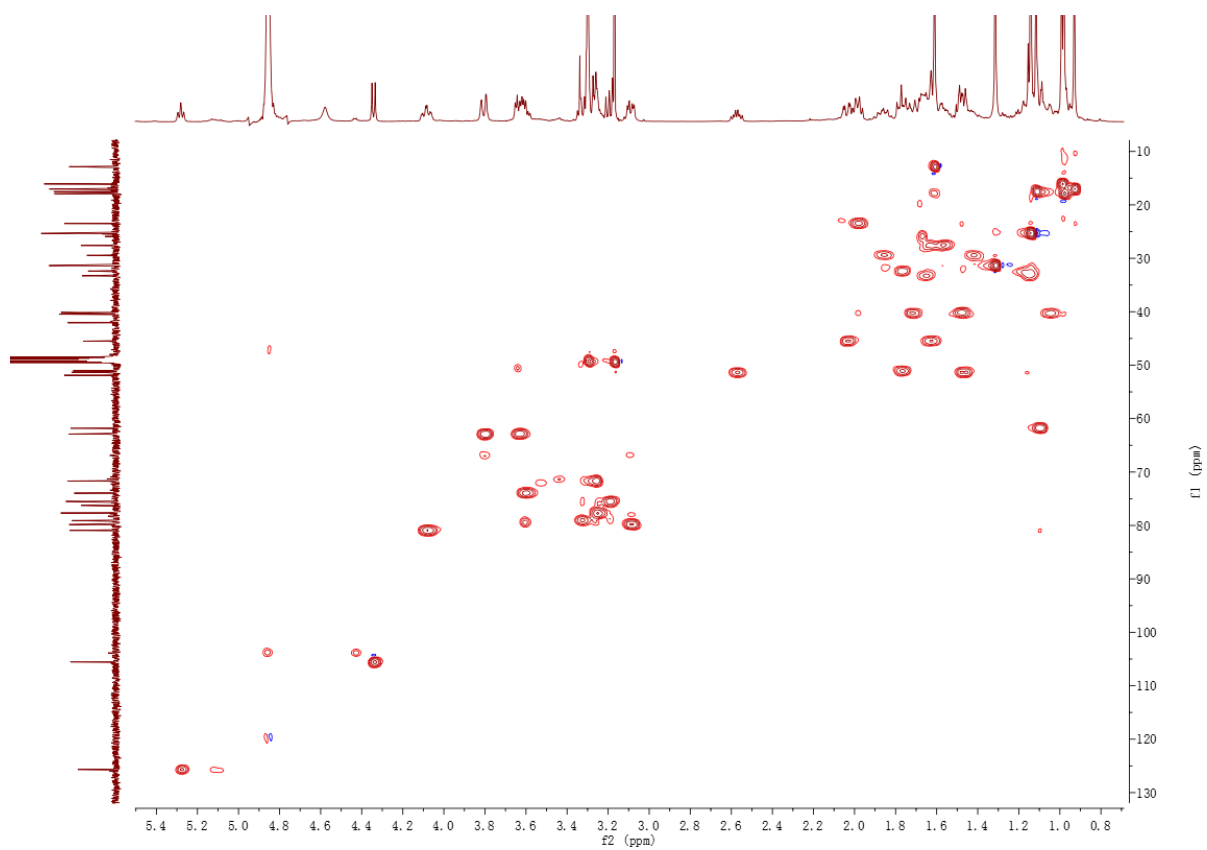

Figure 26 HSQC spectrum of 5

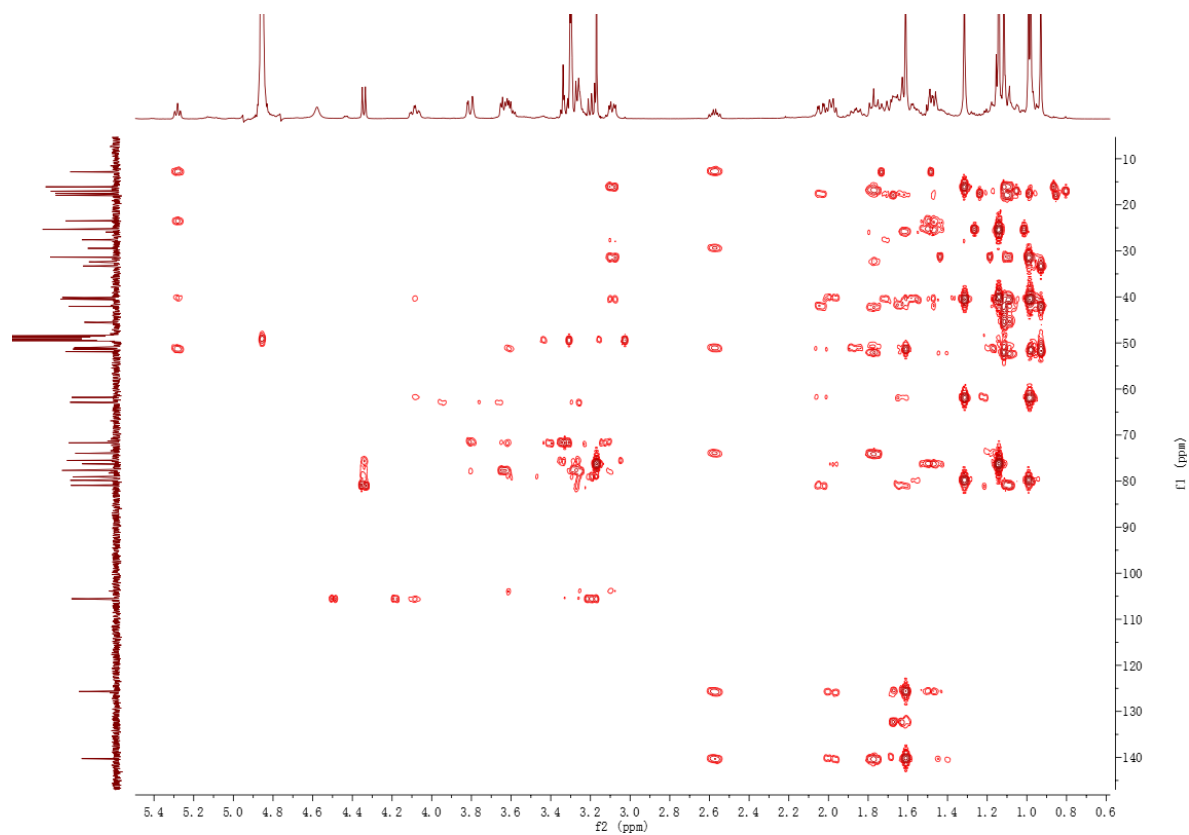

Figure 27 HMBC spectrum of 5

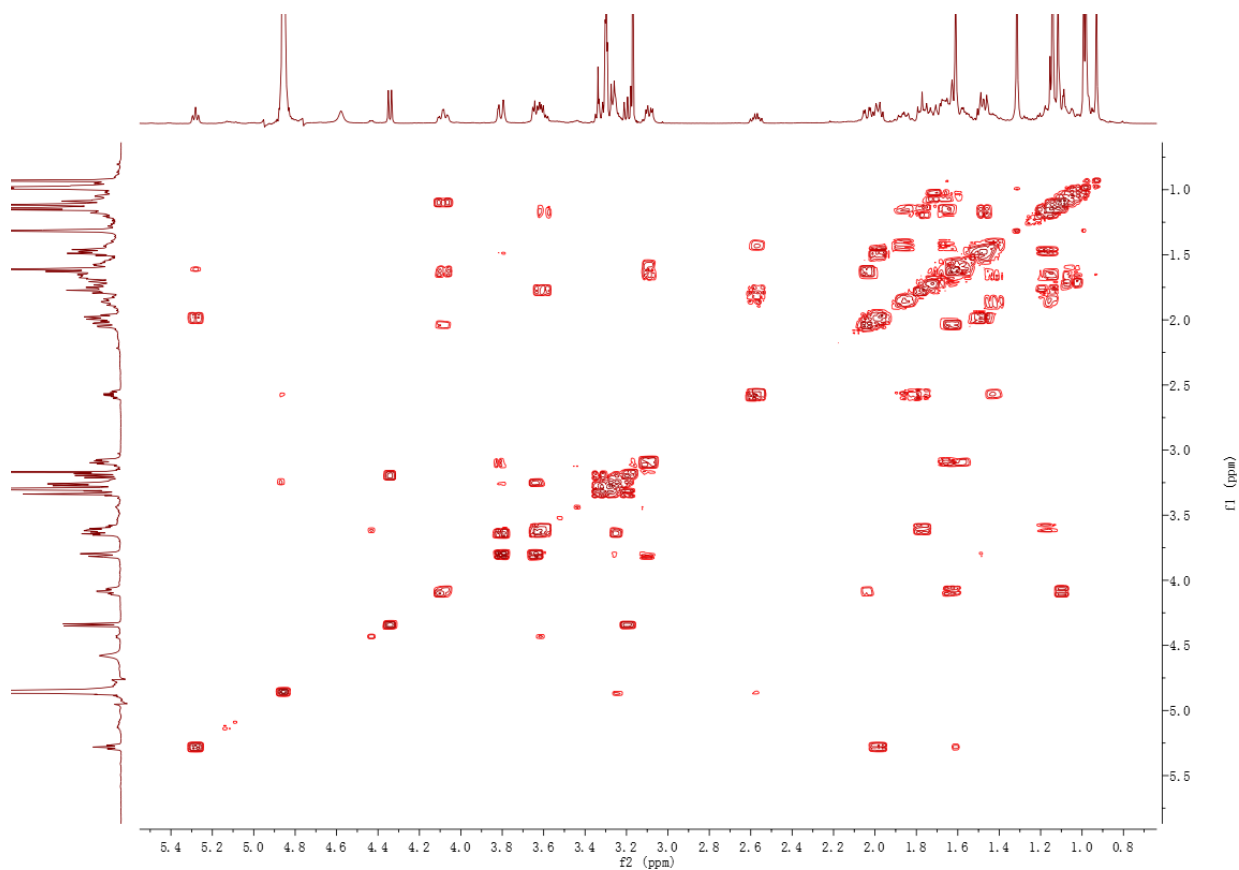

Figure 28  $^1\text{H}$ - $^1\text{H}$  COSY spectrum of **5**

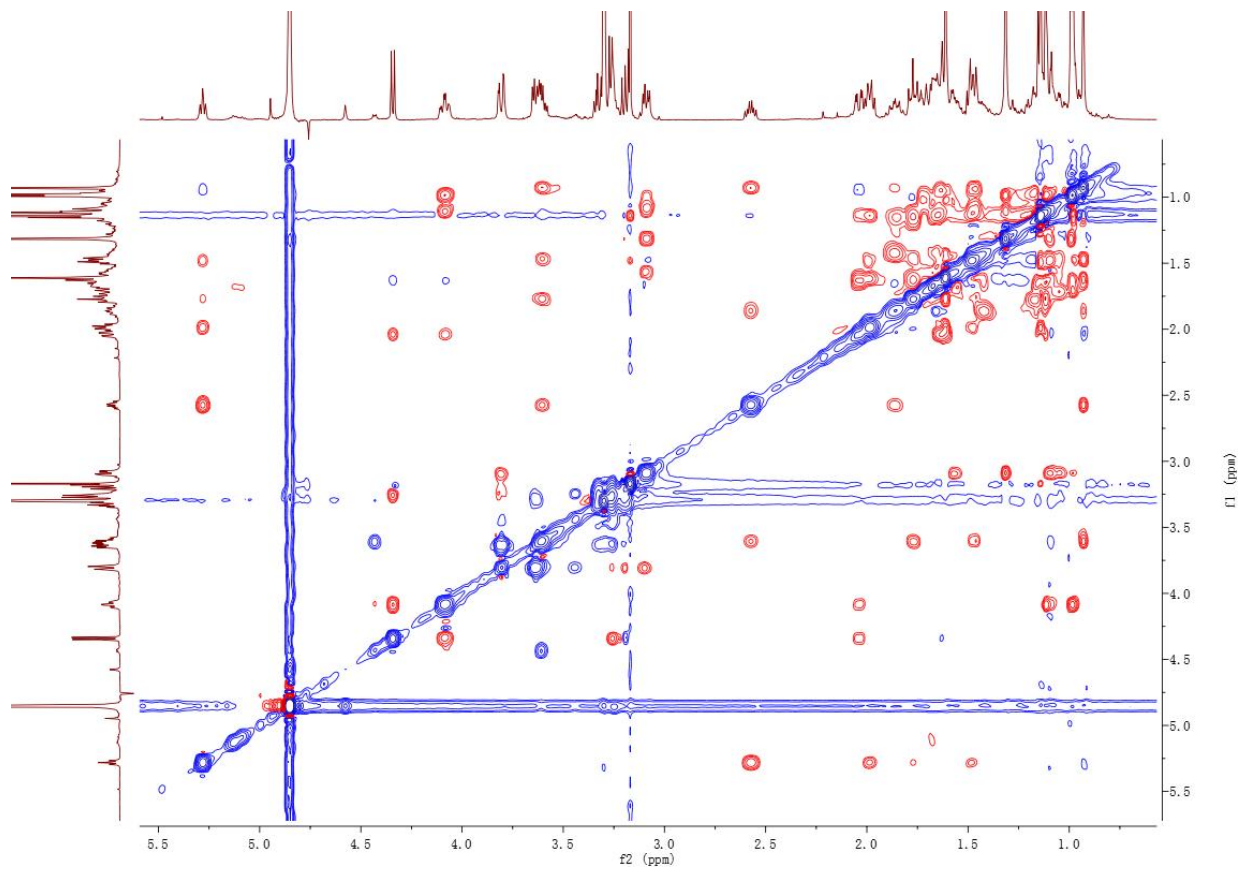

Figure 29 ROESY spectrum of **5**

Data File: E:\DATA\2023\0927\wpn-92d.lcd

| Elmt | Val. | Min | Max | Use Adduct |
|------|------|-----|-----|------|------|-----|-----|------|------|-----|-----|------|------|-----|-----|------------|
| H    | 1    | 10  | 100 | F    | 1    | 0   | 0   | Cl   | 1    | 0   | 0   | Ag   | 1    | 0   | 0   | H          |
| 2H   | 1    | 0   | 0   | Na   | 1    | 0   | 0   | Co   | 2    | 0   | 0   | I    | 3    | 0   | 0   | HCOO       |
| B    | 3    | 0   | 0   | Mg   | 2    | 0   | 0   | Cu   | 2    | 0   | 0   | Ir   | 3    | 0   | 0   | Cl         |
| C    | 4    | 5   | 100 | Si   | 4    | 0   | 0   | Se   | 2    | 0   | 0   | Pt   | 2    | 0   | 0   |            |
| N    | 3    | 0   | 10  | P    | 3    | 0   | 0   | Br   | 1    | 0   | 0   |      |      |     |     |            |
| O    | 2    | 0   | 30  | S    | 2    | 0   | 0   | Pd   | 2    | 0   | 0   |      |      |     |     |            |

Error Margin (ppm): 5  
 HC Ratio: unlimited  
 Max Isotopes: all  
 MSn Iso RI (%): 75.00

DBE Range: not fixed  
 Apply N Rule: no  
 Isotope RI (%): 1.00  
 MSn Logic Mode: OR

Electron Ions: both  
 Use MSn Info: yes  
 Isotope Res: 10000  
 Max Results: 30

Event#: 2 MS(E-) Ret. Time : 0.360 -> 0.387 Scan# : 56 -> 60

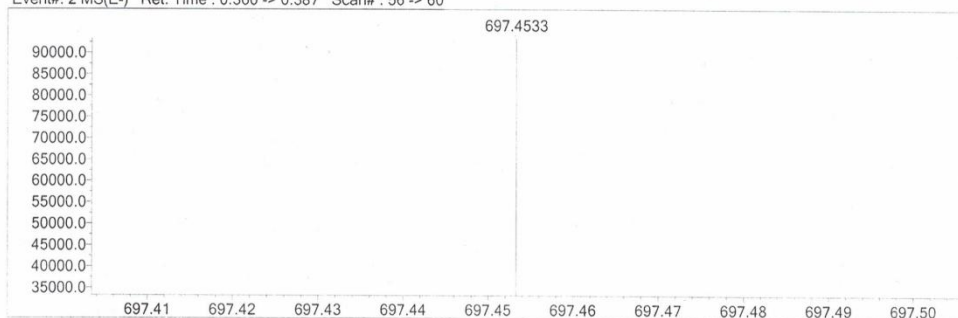

Measured region for 697.4533 m/z

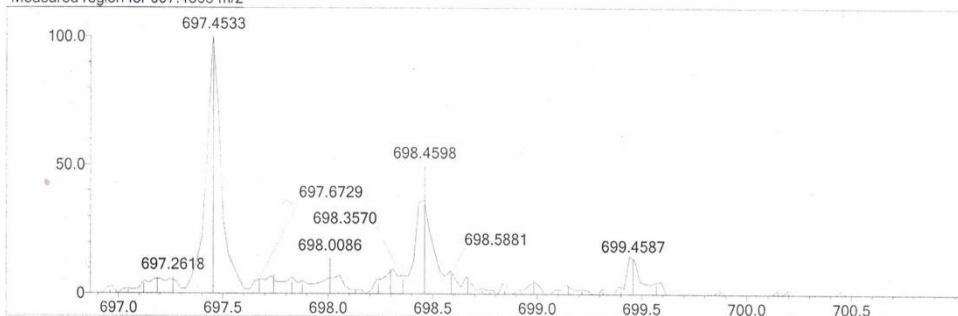

C37 H64 O9 [M+HCOO]- : Predicted region for 697.4532 m/z

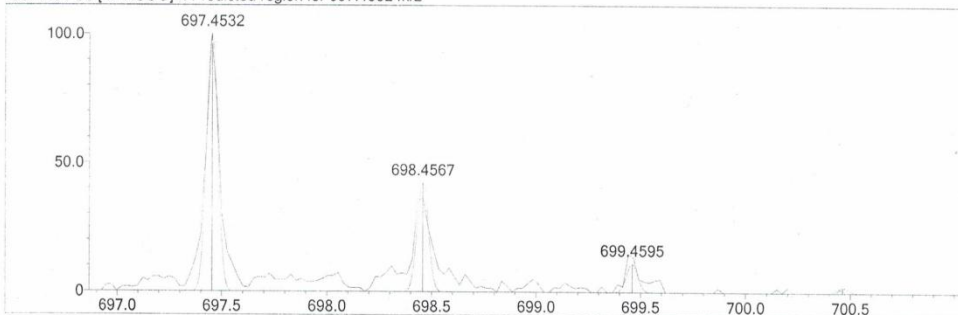

| Formula (M) | Ion       | Meas. m/z | Pred. m/z | Df. (mDa) | Df. (ppm) | DBE |
|-------------|-----------|-----------|-----------|-----------|-----------|-----|
| C37 H64 O9  | [M+HCOO]- | 697.4533  | 697.4532  | 0.1       | 0.14      | 6.0 |

Figure 30 HRESIMS spectrum of 5

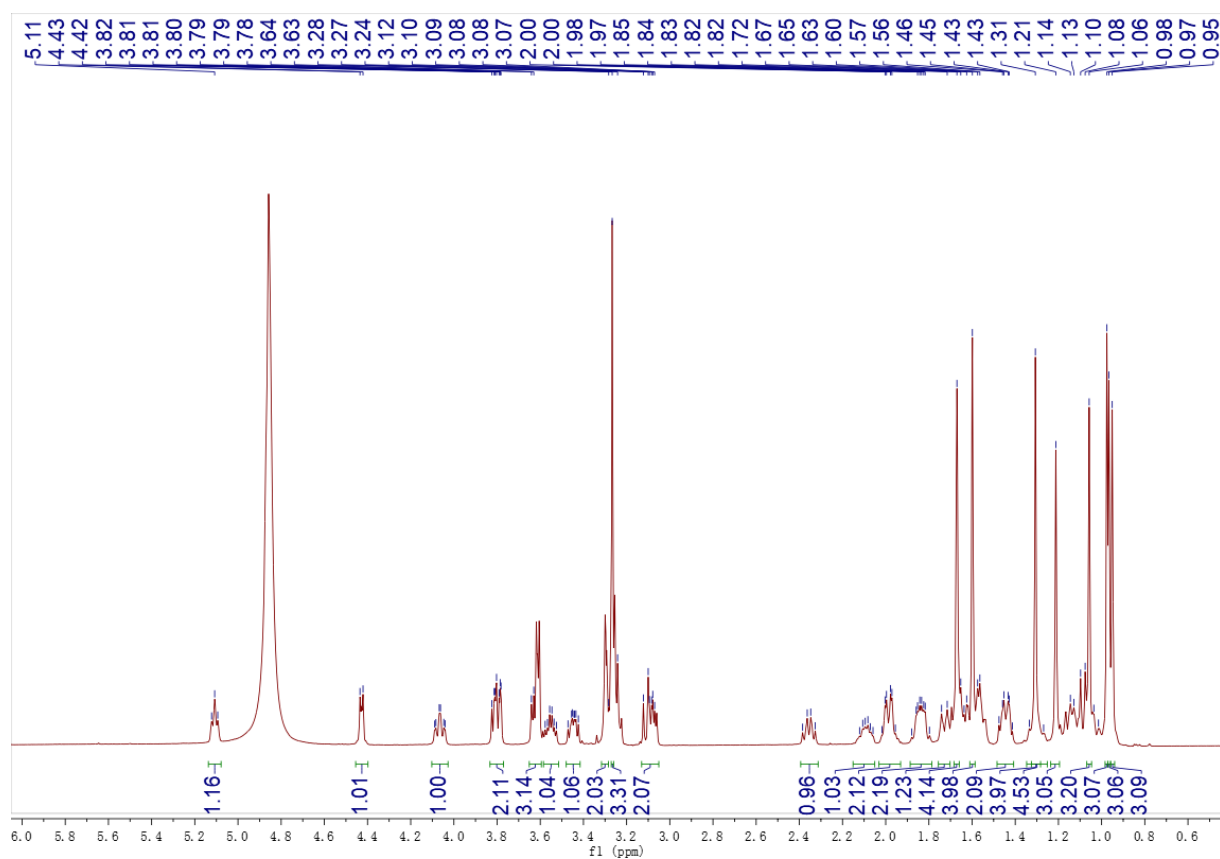

Figure 31  $^1\text{H}$  NMR spectrum of **6**

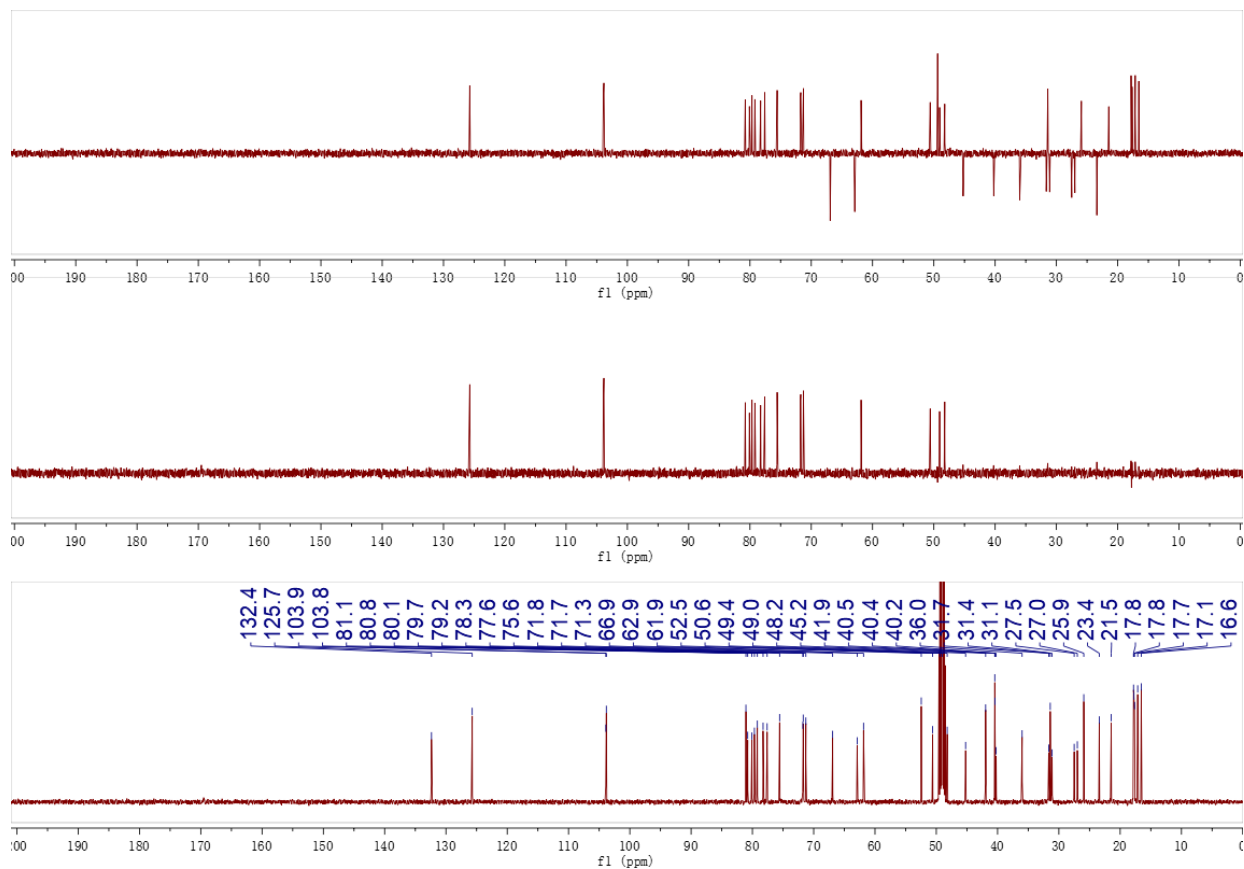

Figure 32  $^{13}\text{C}$  and DEPT NMR spectrum of **6**

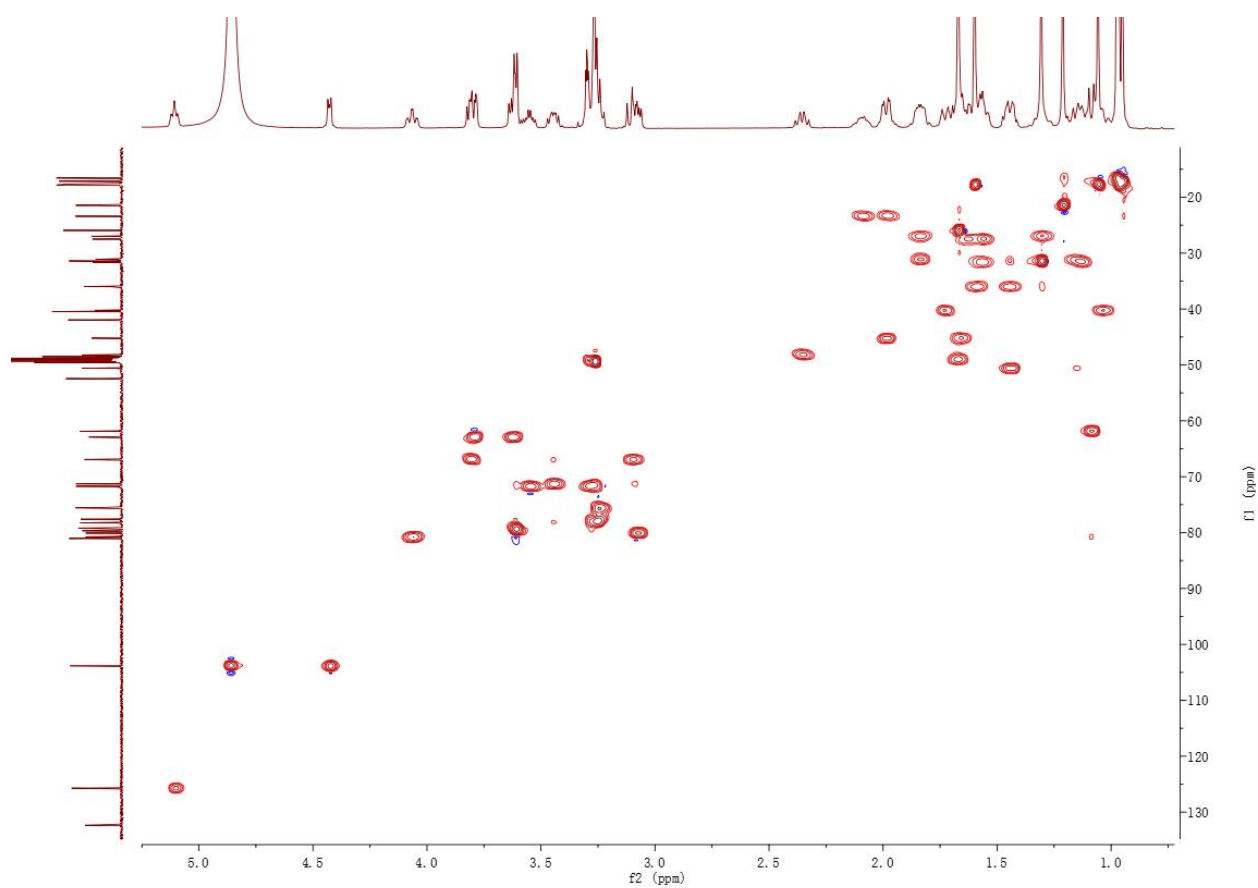

Figure 33 HSQC spectrum of 6

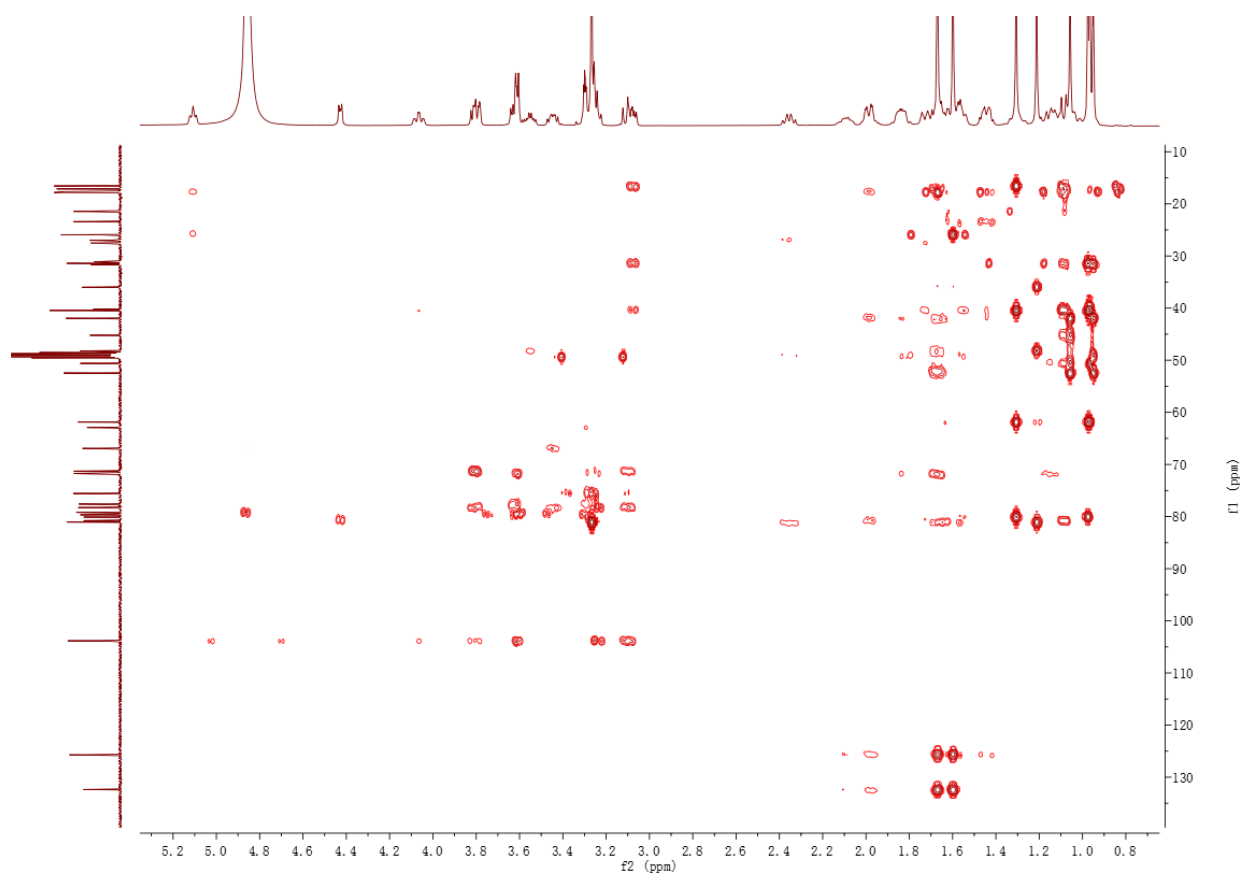

Figure 34 HMBC spectrum of 6

Data File: E:\DATA\2023\0927\wpn-92e.lcd

| Elmt | Val. | Min | Max | Use Adduct |
|------|------|-----|-----|------|------|-----|-----|------|------|-----|-----|------|------|-----|-----|------------|
| H    | 1    | 10  | 100 | F    | 1    | 0   | 0   | Cl   | 1    | 0   | 0   | Ag   | 1    | 0   | 0   | H          |
| 2H   | 1    | 0   | 0   | Na   | 1    | 0   | 0   | Co   | 2    | 0   | 0   | I    | 3    | 0   | 0   | HCOO       |
| B    | 3    | 0   | 0   | Mg   | 2    | 0   | 0   | Cu   | 2    | 0   | 0   | Ir   | 3    | 0   | 0   | Cl         |
| C    | 4    | 5   | 100 | Si   | 4    | 0   | 0   | Se   | 2    | 0   | 0   | Pt   | 2    | 0   | 0   |            |
| N    | 3    | 0   | 10  | P    | 3    | 0   | 0   | Br   | 1    | 0   | 0   |      |      |     |     |            |
| O    | 2    | 0   | 30  | S    | 2    | 0   | 0   | Pd   | 2    | 0   | 0   |      |      |     |     |            |

Error Margin (ppm): 5  
 HC Ratio: unlimited  
 Max Isotopes: all  
 MSn Iso RI (%): 75.00

DBE Range: not fixed  
 Apply N Rule: no  
 Isotope RI (%): 1.00  
 MSn Logic Mode: OR

Electron Ions: both  
 Use MSn Info: yes  
 Isotope Res: 10000  
 Max Results: 30

Event#: 2 MS(E-) Ret. Time : 0.320 -> 0.373 Scan# : 50 -> 58

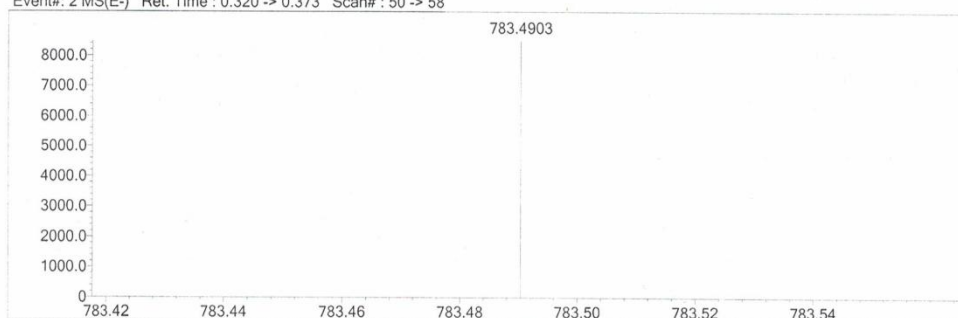

Measured region for 783.4903 m/z

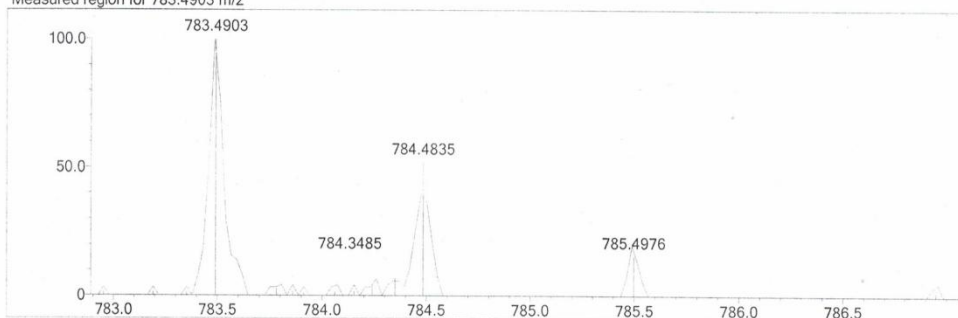

C42 H72 O13 [M-H]- : Predicted region for 783.4900 m/z

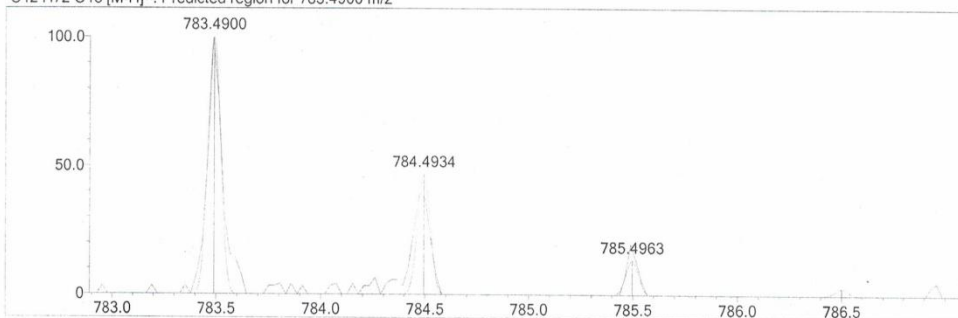

| Formula (M) | Ion    | Meas. m/z | Pred. m/z | Df. (mDa) | Df. (ppm) | DBE |
|-------------|--------|-----------|-----------|-----------|-----------|-----|
| C42 H72 O13 | [M-H]- | 783.4903  | 783.4900  | 0.3       | 0.38      | 7.0 |

Figure 35 HRESIMS spectrum of 6
